# Supplementary material for: Chemoselective photocatalytic oxidation of alcohols to aldehydes and ketones by nitromethane on titanium dioxide under violet 400 nm LED light irradiation
Source: Royal Society of Chemistry journal article supplement (doi:10.1039/c9ob02183c), 2020-01-01
Supplement: c9ob02183c1.pdf [file c9ob02183c1.pdf]

## Supporting information

### Chemoselective photocatalytic oxidation of alcohols to aldehydes and ketones by nitromethane on titanium dioxide under violet 400 nm LED light irradiation

Azam Rahimi Niaraki <sup>a</sup>, Mohammad Reza Saraee <sup>a</sup>, Foad Kazemi <sup>a,b\*</sup>, Babak Kaboudin <sup>a</sup>

<sup>a</sup> Department of Chemistry, Institute for Advanced Studies in Basic Sciences (IASBS), Gava Zang, Zanjan, 45137-66731, Iran.

<sup>b</sup> Center for Climate and Global Warming (CCGW), Institute for Advanced Studies in Basic Sciences (IASBS), Gava Zang, Zanjan, 45137-66731, Iran.

\* Corresponding Author: E-mail: [kazemi\\_f@iasbs.ac.ir](mailto:kazemi_f@iasbs.ac.ir); Phone: +98 24 3315-3219; Fax: +98 24 3315-3232.

#### Table of contents

|                                                                         |      |
|-------------------------------------------------------------------------|------|
| 1. Mass spectrum of imines.....                                         | 2    |
| 2. TEM of TiO <sub>2</sub> photocatalyst.....                           | 3    |
| 3. TGA of TiO <sub>2</sub> photocatalyst.....                           | 4    |
| 4. BET of TiO <sub>2</sub> photocatalyst.....                           | 5    |
| 5. Reusability of the catalyst .....                                    | 6    |
| 6. <sup>13</sup> C NMR and <sup>1</sup> H NMR spectra of products ..... | 7-30 |

## 1. mass spectrum

a)

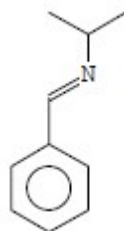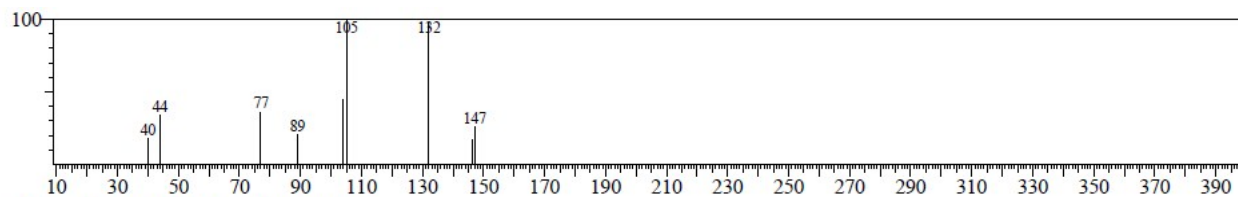

b)

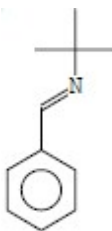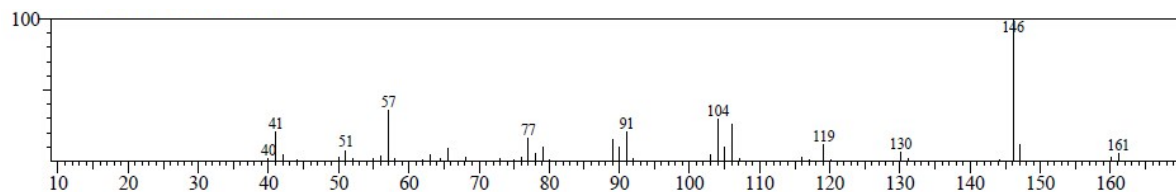

**Figure S1:** The mass spectrum of the imines obtained in the reaction of benzaldehyde in the presence of a) 2-nitropropane and b) 2-methyl-2-nitropropane

## 2. TEM

a)

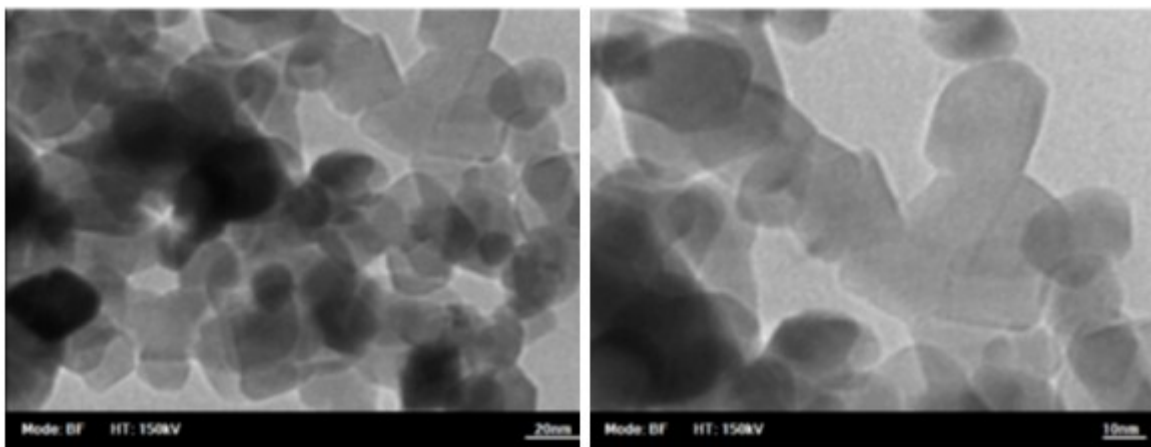

b)

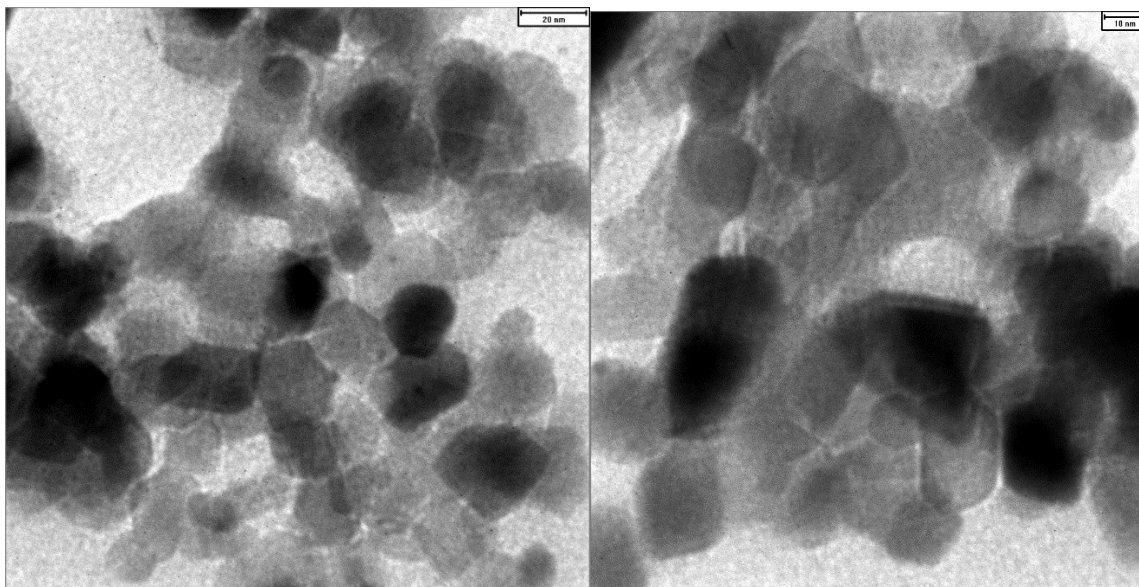

**Figure S2:** TEM images of TiO<sub>2</sub> - P25 before (a) and after the reaction (b)

### 3.TGA

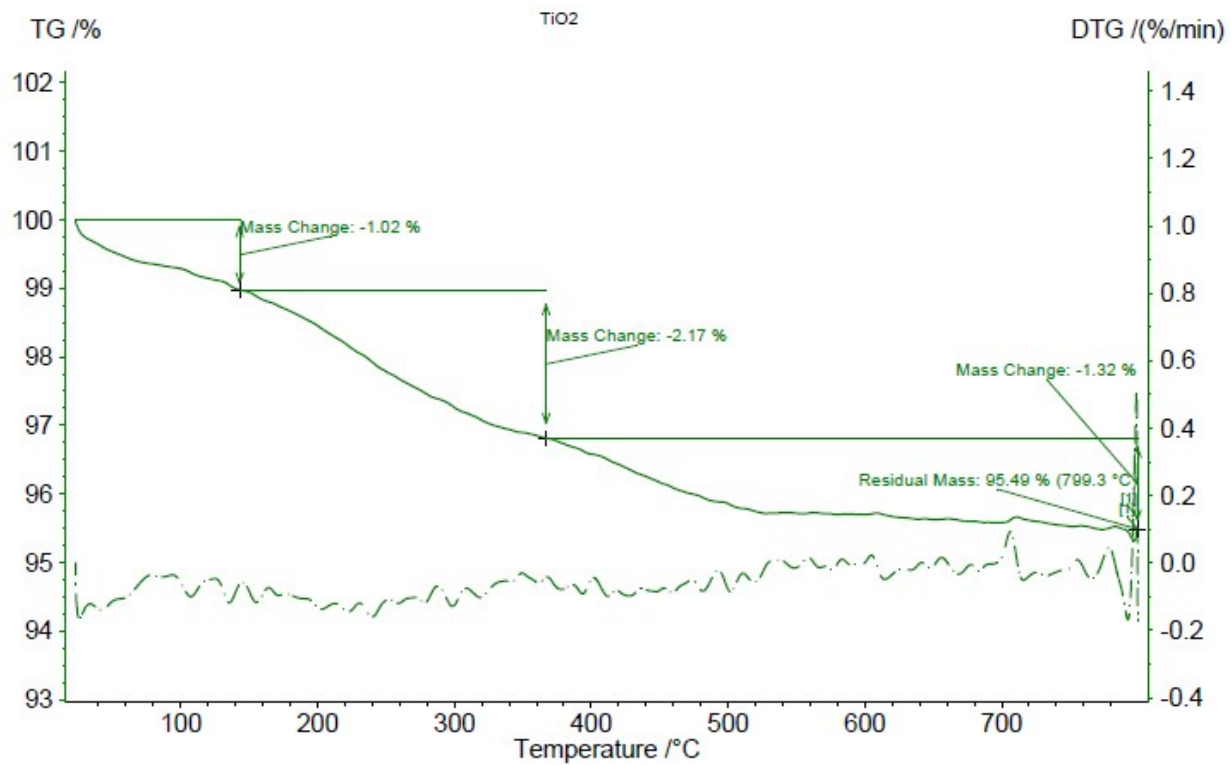

**Figure S3.** TG/DTG analysis of TiO<sub>2</sub>- P25 after the reaction

## 4. BET

Table S1: Physical Properties of the Catalyst

| catalyst                                 | BET(m <sup>2</sup> /g) | Pore volume |
|------------------------------------------|------------------------|-------------|
| TiO <sub>2</sub> P25 before the reaction | 70                     | 0.6         |
| TiO <sub>2</sub> P25 after the reaction  | 49.4                   | 0.41        |

a)

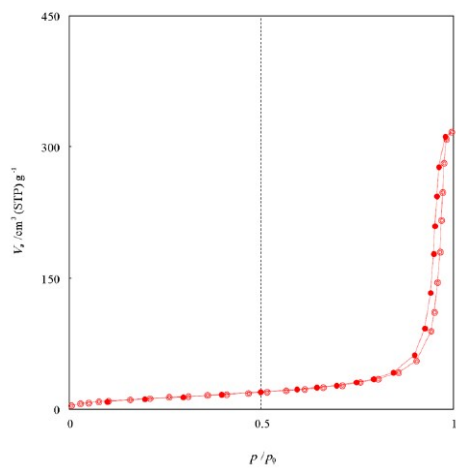

b)

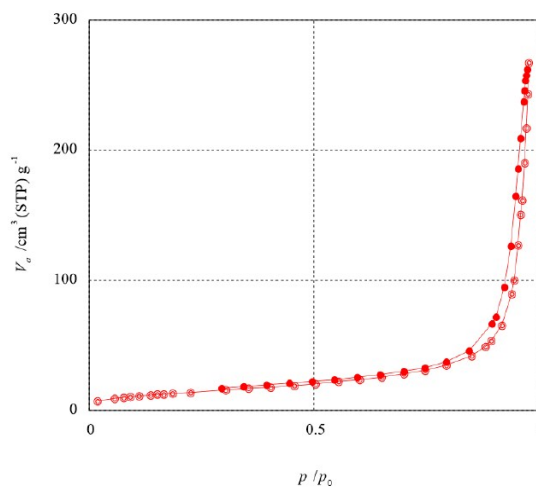

**Figure S4.** N<sub>2</sub> Adsorption / desorption isotherm of TiO<sub>2</sub> P25 before (a) and after the reaction (b)

## 5. Reusability of the catalyst

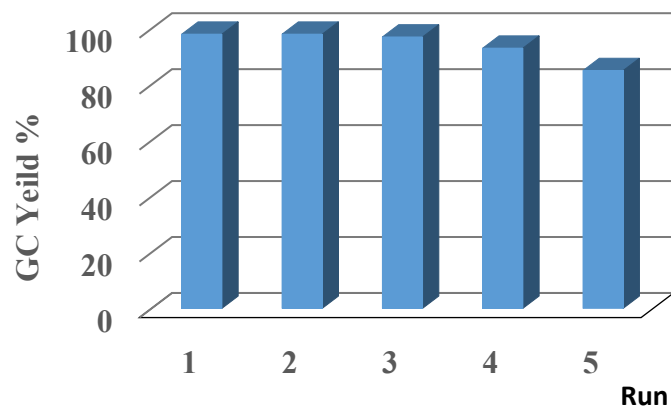

**Figure S5.** Reusability of the catalyst in the photocatalytic oxidation of 4-methoxybenzyl alcohol under light irradiation

## 6. $^{13}\text{C}$ NMR and $^1\text{H}$ NMR spectra of products

Synthesized compounds are known compounds. <sup>1-8</sup> The spectrum of NMR products is as follows:

### Benzaldehyde

$^1\text{H}$  NMR (400 MHz,  $\text{CDCl}_3$ ):  $\delta$  10.06 (s, 1H), 7.92 (d,  $J = 8.0$  Hz, 2H), 7.70 – 7.64 (m, 1H), 7.57 (t,  $J = 7.5$  Hz, 2H).  $^{13}\text{C}$  NMR (101 MHz,  $\text{CDCl}_3$ ):  $\delta$  192.40, 136.44, 134.48, 129.76, 129.02.

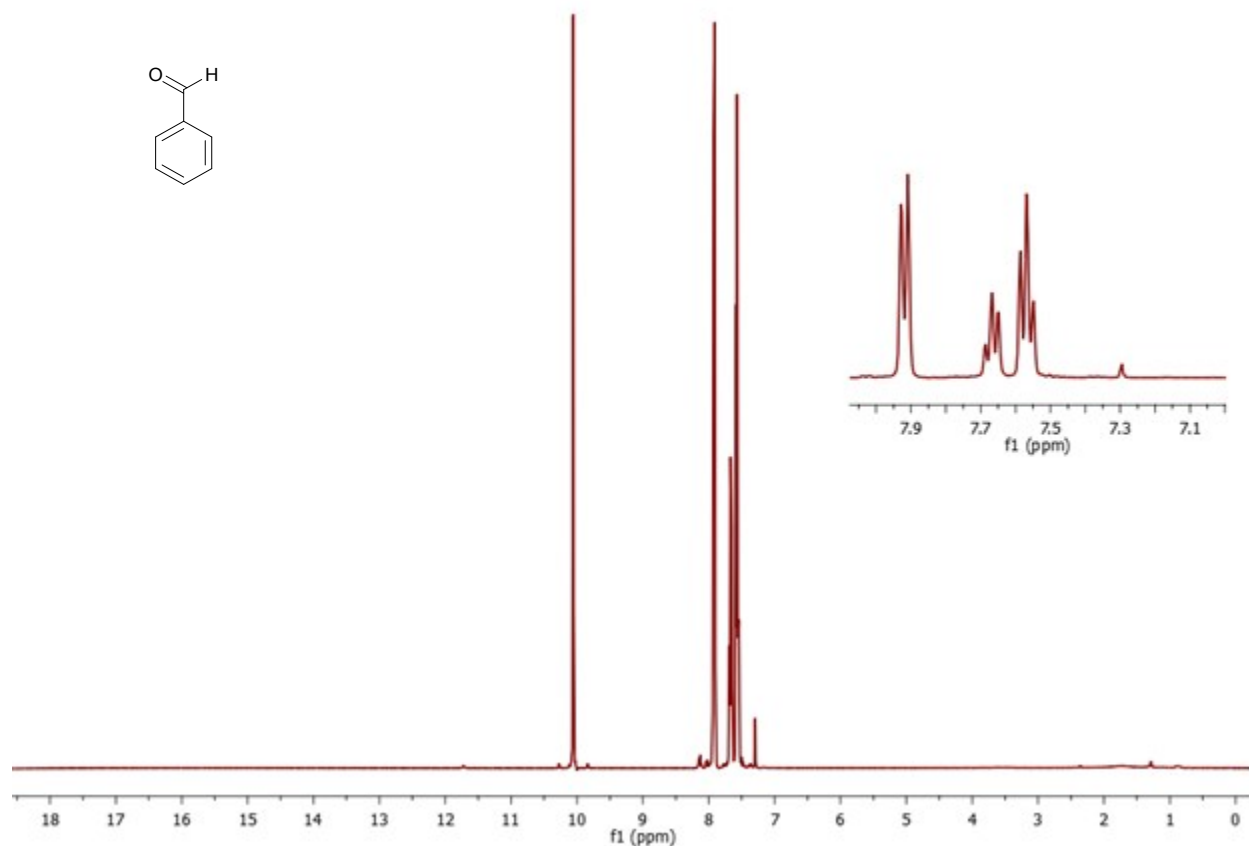

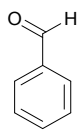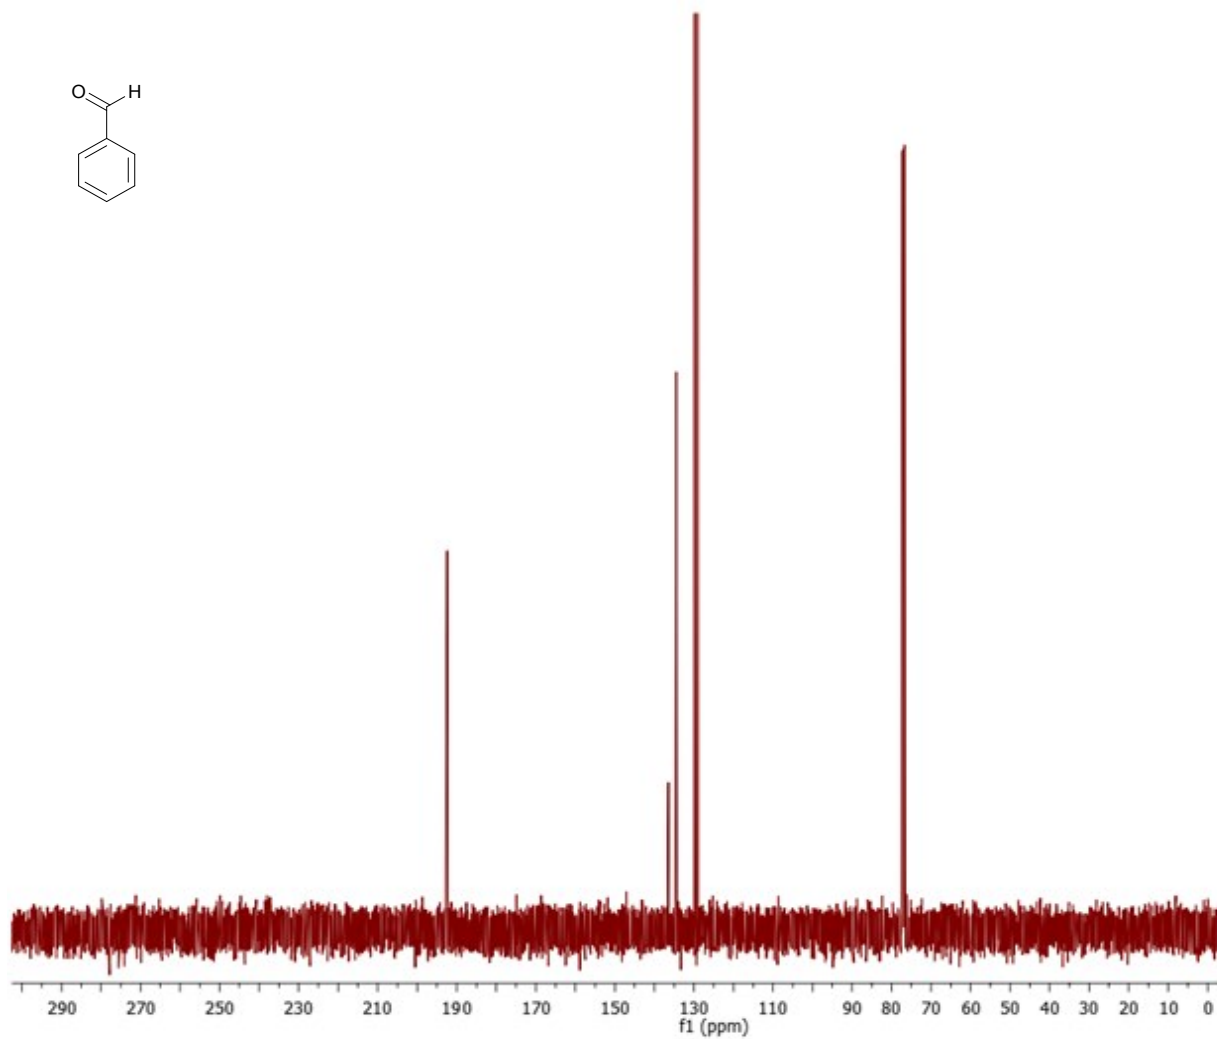



## 4-Methoxybenzaldehyde

$^1\text{H}$  NMR (400 MHz,  $\text{CDCl}_3$ )  $\delta$  9.81 (s, 1H), 7.76 (d,  $J = 8.8$  Hz, 2H), 6.93 (d,  $J = 8.7$  Hz, 2H), 3.80 (s, 3H).

$^{13}\text{C}$  NMR (101 MHz,  $\text{CDCl}_3$ )  $\delta$  190.76 (s), 164.27 (s), 131.91 (s), 129.87 (s), 114.28 (s), 55.31 (s).

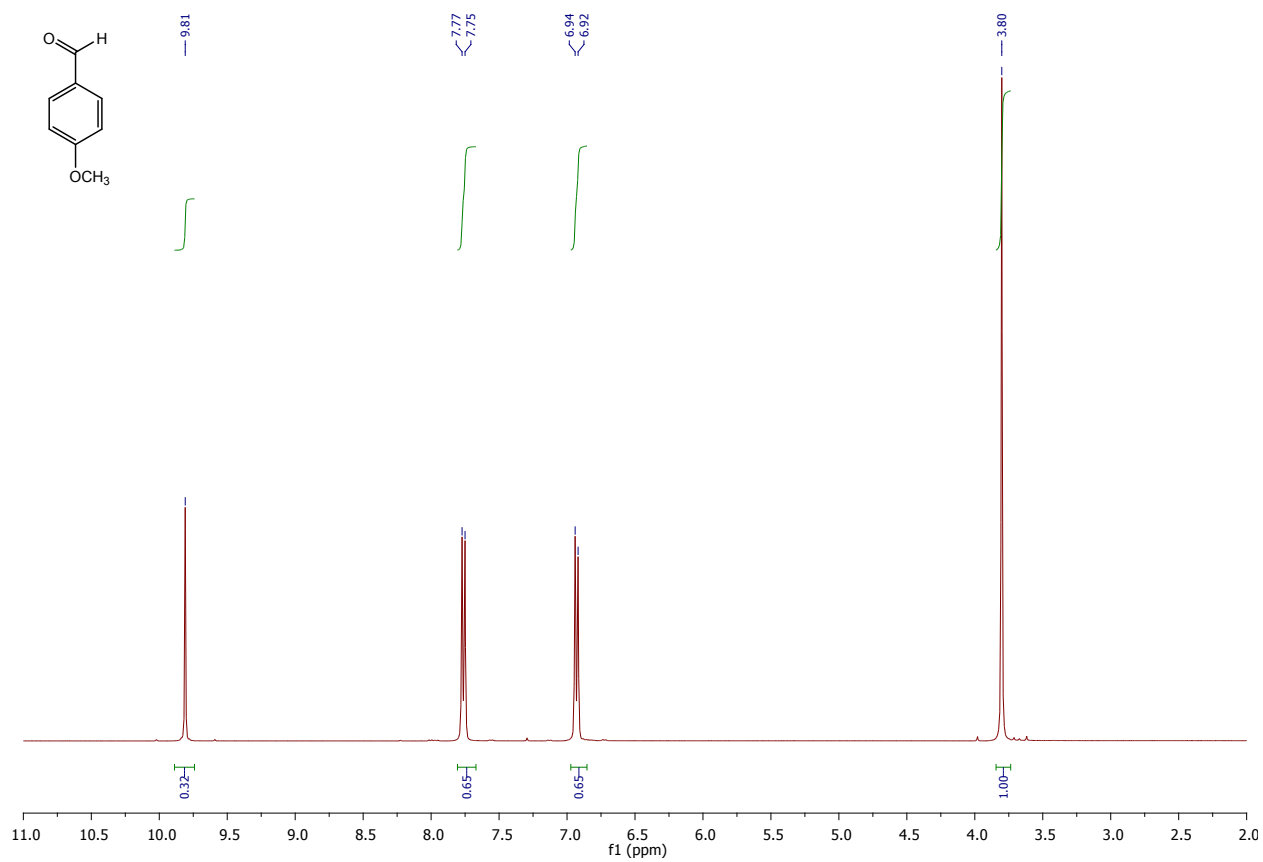

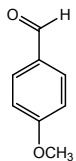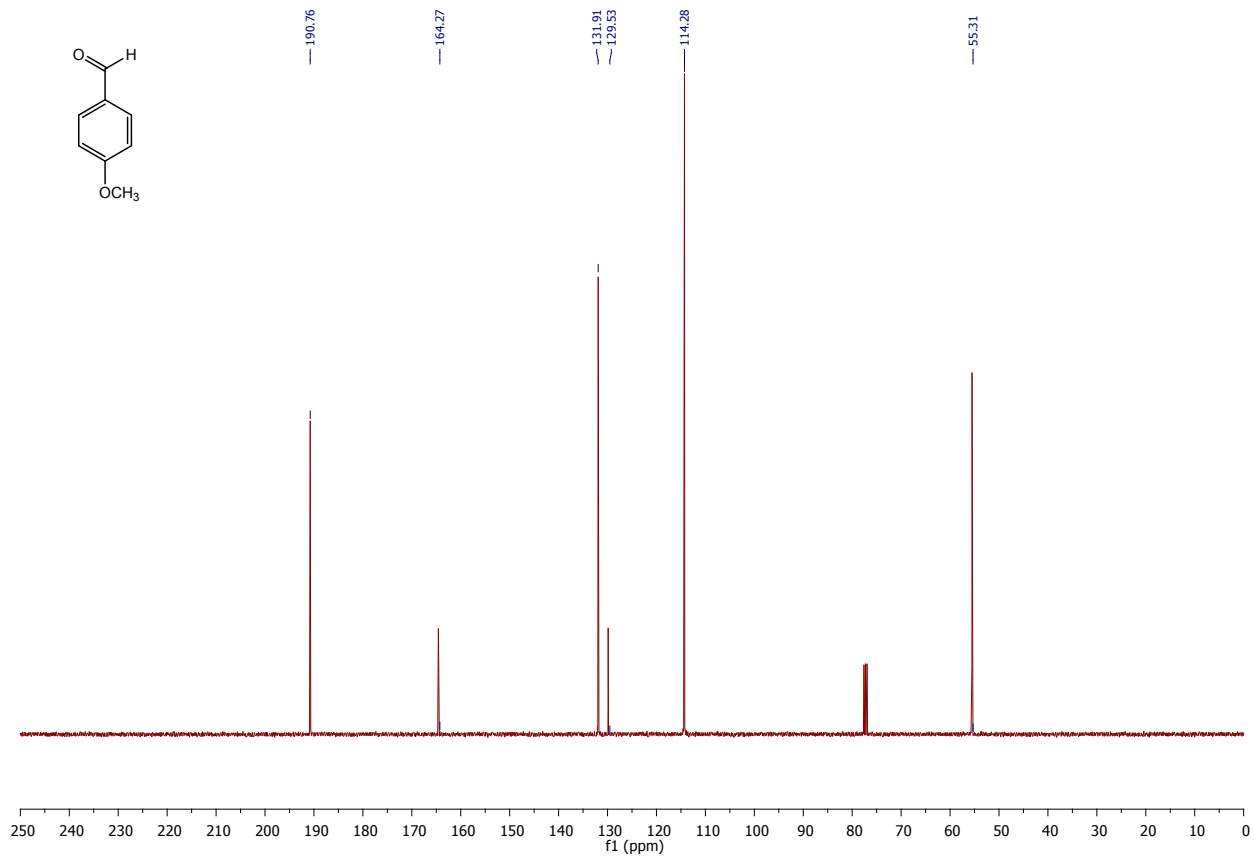

### 3-Methoxybenzaldehyde

$^1\text{H}$  NMR (400 MHz,  $\text{CDCl}_3$ )  $\delta$  9.94 (s, 1H), 7.47 – 7.38 (m, 2H), 7.36 (s, 1H), 7.14 (d,  $J = 9.1$  Hz, 1H), 3.82 (s, 3H).  $^{13}\text{C}$  NMR (101 MHz,  $\text{CDCl}_3$ )  $\delta$  192.42, 160.19, 137.65, 129.57, 123.19, 121.42, 112.11, 55.13.

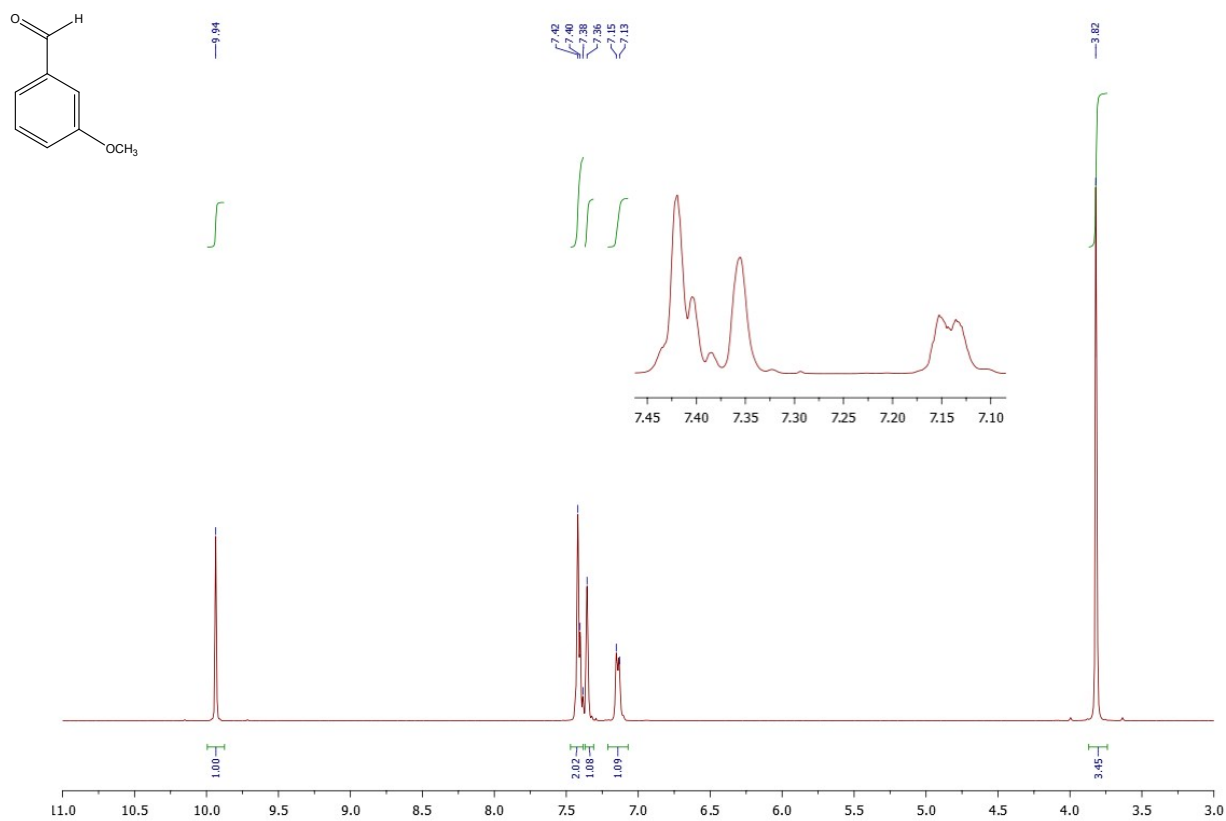

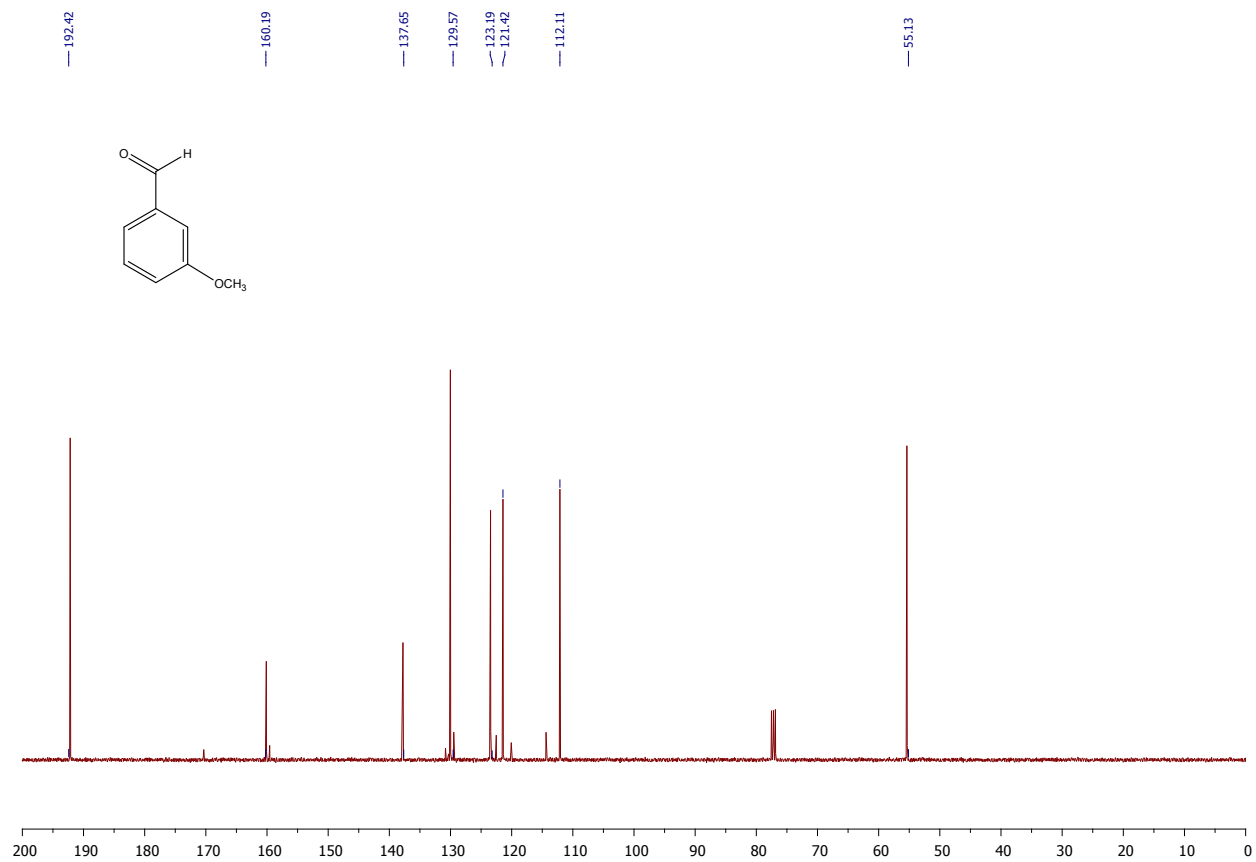

## 4-Isopropyl benzaldehyde

$^1\text{H}$  NMR (400 MHz,  $\text{CDCl}_3$ )  $\delta$  10.01 (s, 1H), 7.85 (d,  $J = 7.9$  Hz, 2H), 7.42 (d,  $J = 7.7$  Hz, 2H), 3.37 – 2.84 (m, 1H), 1.32

(d,  $J = 8.1$  Hz, 7H).  $^{13}\text{C}$  NMR (101 MHz,  $\text{CDCl}_3$ )  $\delta$  191.99, 156.19, 130.22, 127.17, 34.42, 23.65.

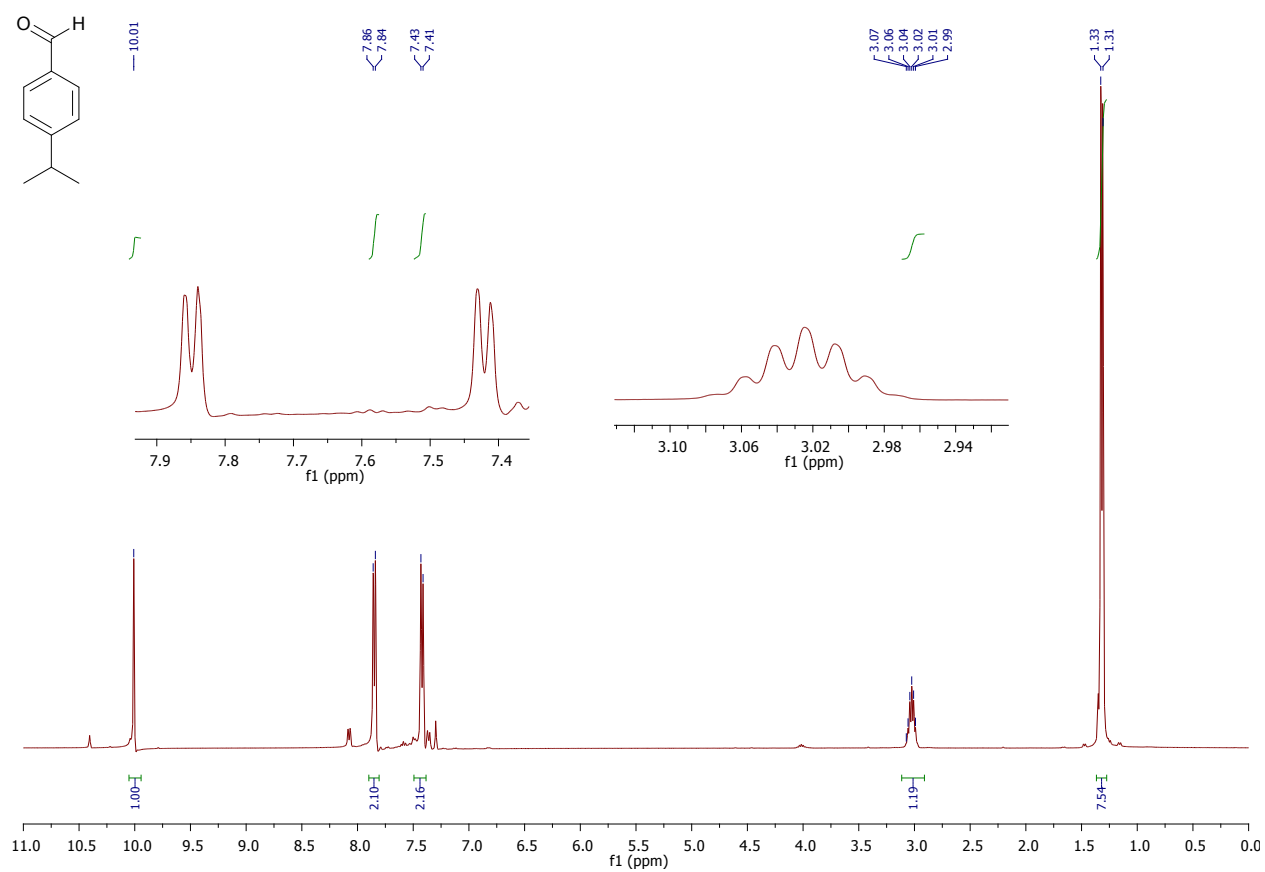

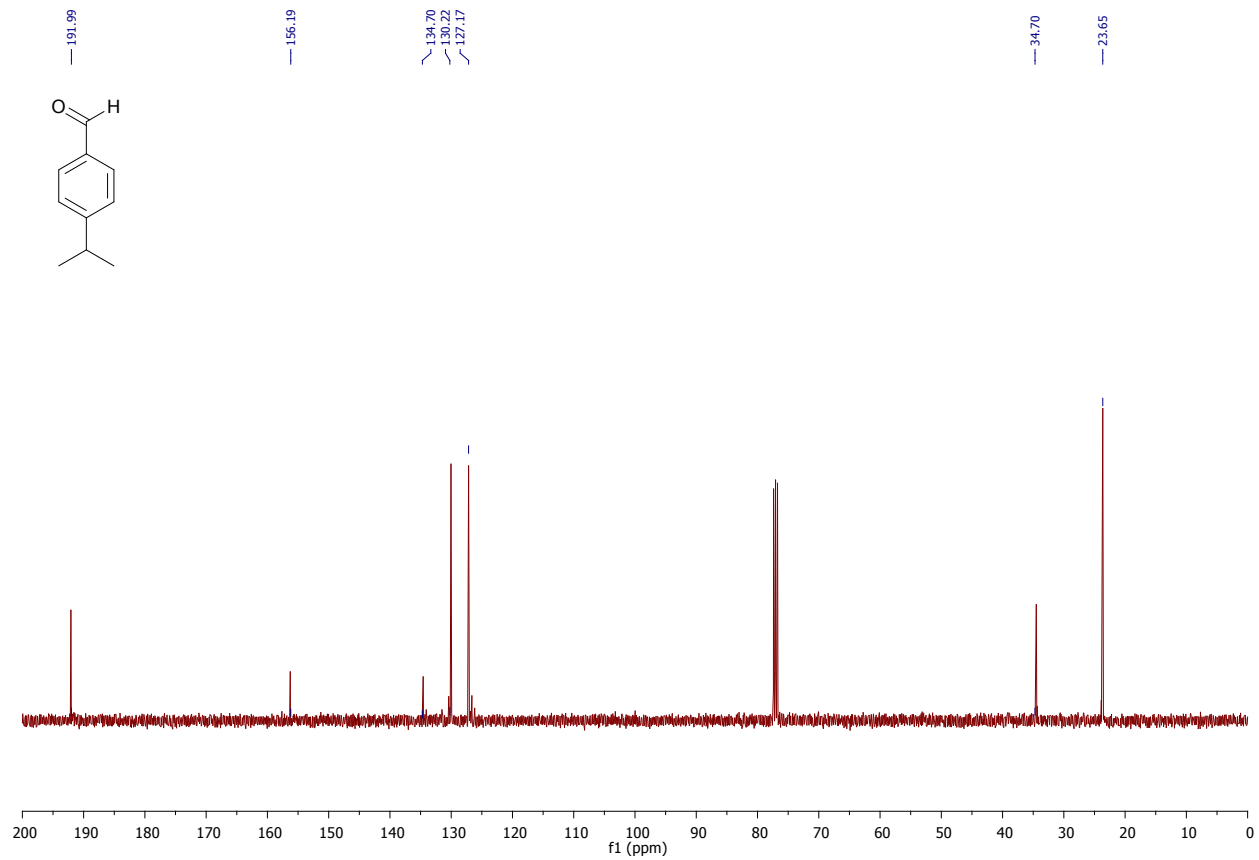

## 4-Chlorobenzaldehyde

$^1\text{H}$  NMR (400 MHz,  $\text{CDCl}_3$ )  $\delta$  10.02 (s, 1H), 7.83 (d,  $J = 8.4$  Hz, 2H), 7.52 (d,  $J = 8.4$  Hz, 2H).  $^{13}\text{C}$  NMR (101 MHz,  $\text{CDCl}_3$ )

$\delta$  190.91, 140.94, 134.71, 130.93, 129.46.

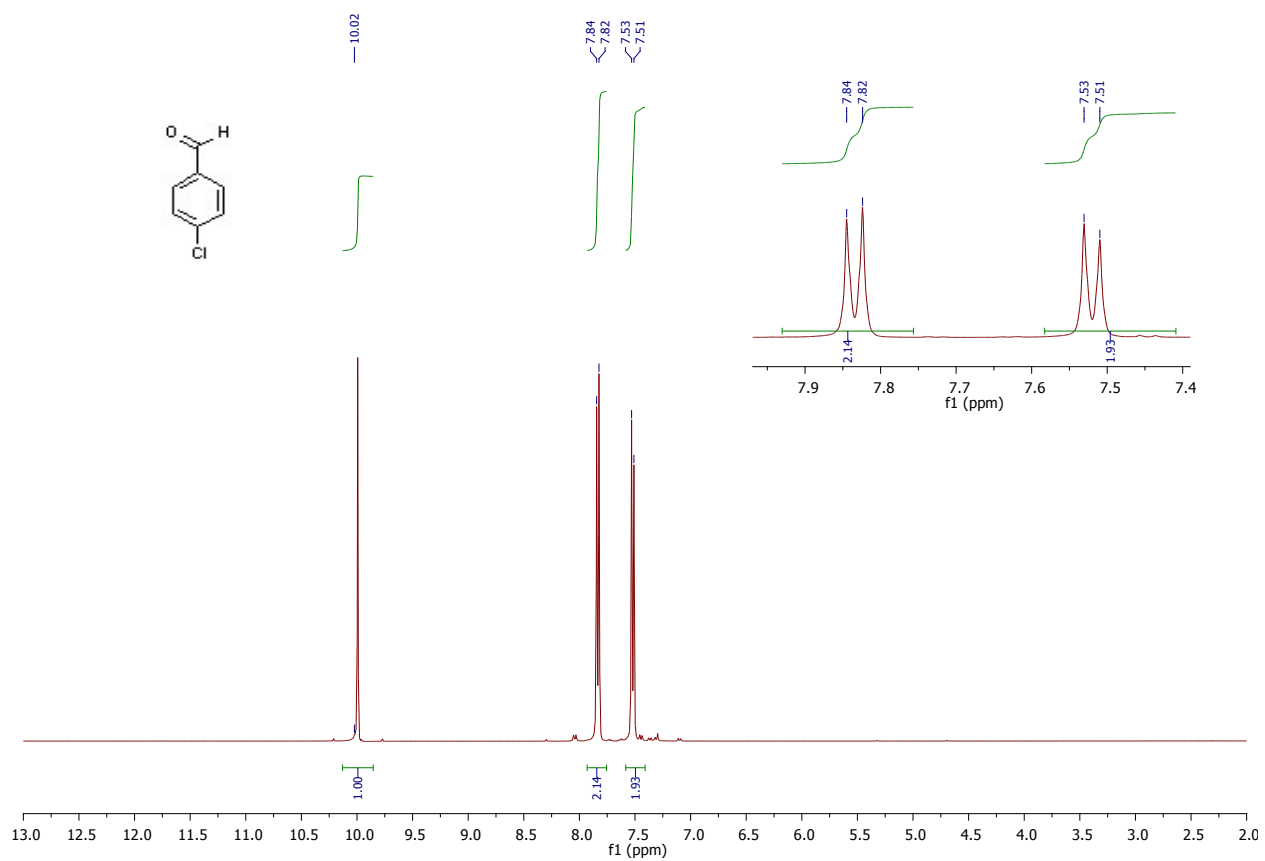

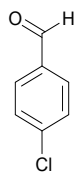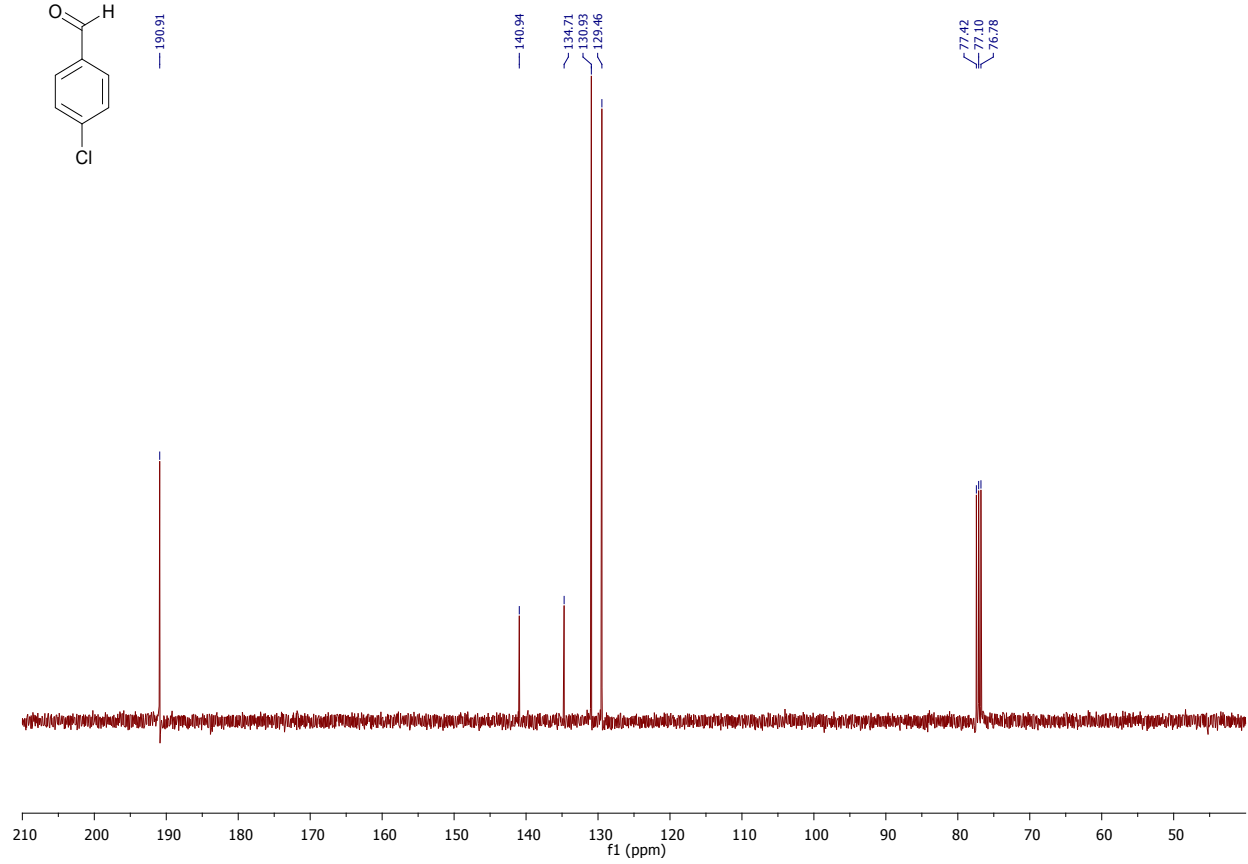



## 2,4-Dichlorobenzaldehyde

$^1\text{H}$  NMR (400 MHz,  $\text{CDCl}_3$ )  $\delta$  10.41 (s, 1H), 7.87 (d,  $J = 8.4$  Hz, 1H), 7.47 (s, 1H), 7.38 (d,  $J = 9.5$  Hz, 1H).  $^{13}\text{C}$  NMR (101 MHz,  $\text{CDCl}_3$ )  $\delta$  188.50, 141.14, 138.53, 130.90, 130.17, 127.96 .

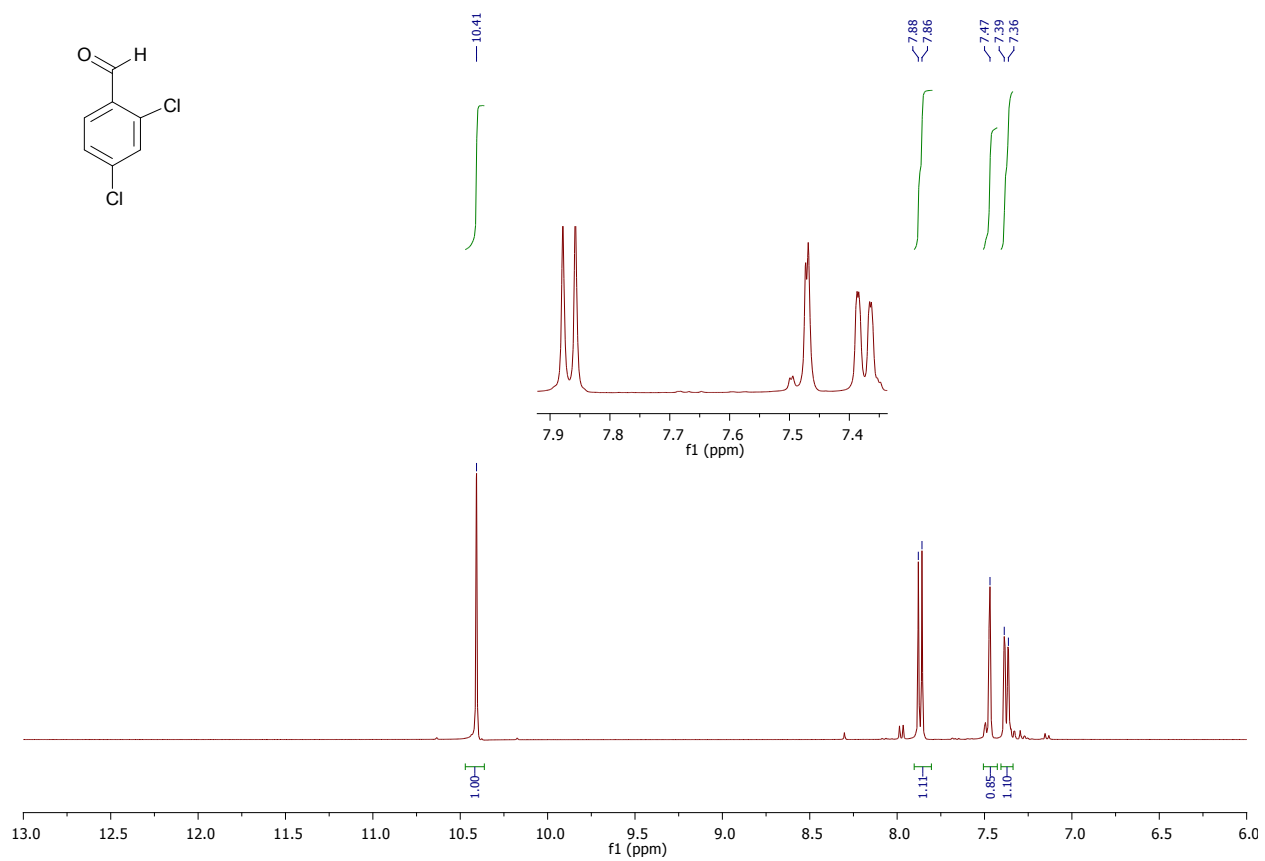

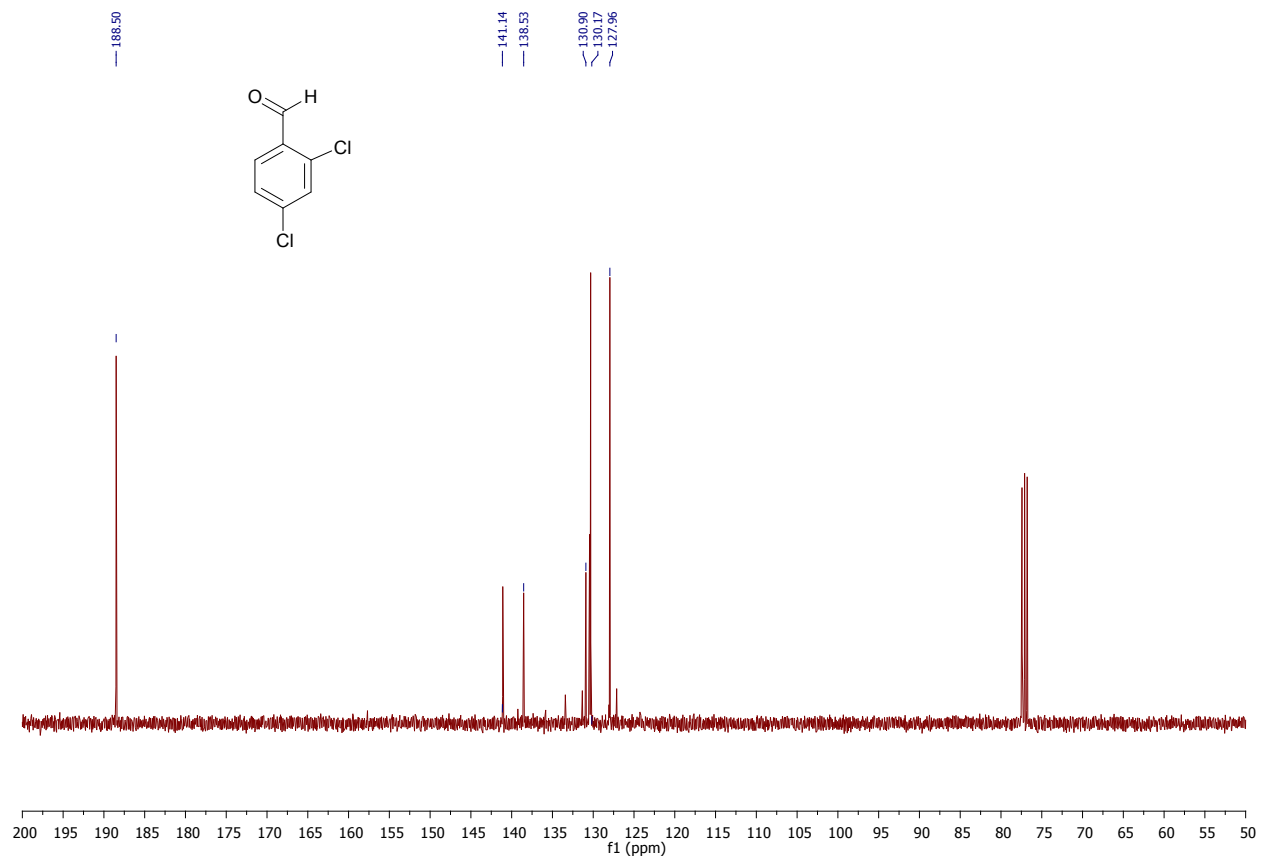

## 4-Nitrobenzaldehyde

$^1\text{H}$  NMR (400 MHz,  $\text{CDCl}_3$ )  $\delta$  10.17 (s, 1H), 8.38 (s, 2H), 8.09 (s, 2H).  $^{13}\text{C}$  NMR (101 MHz,  $\text{CDCl}_3$ )  $\delta$  190.27, 150.54, 130.43, 124.06.

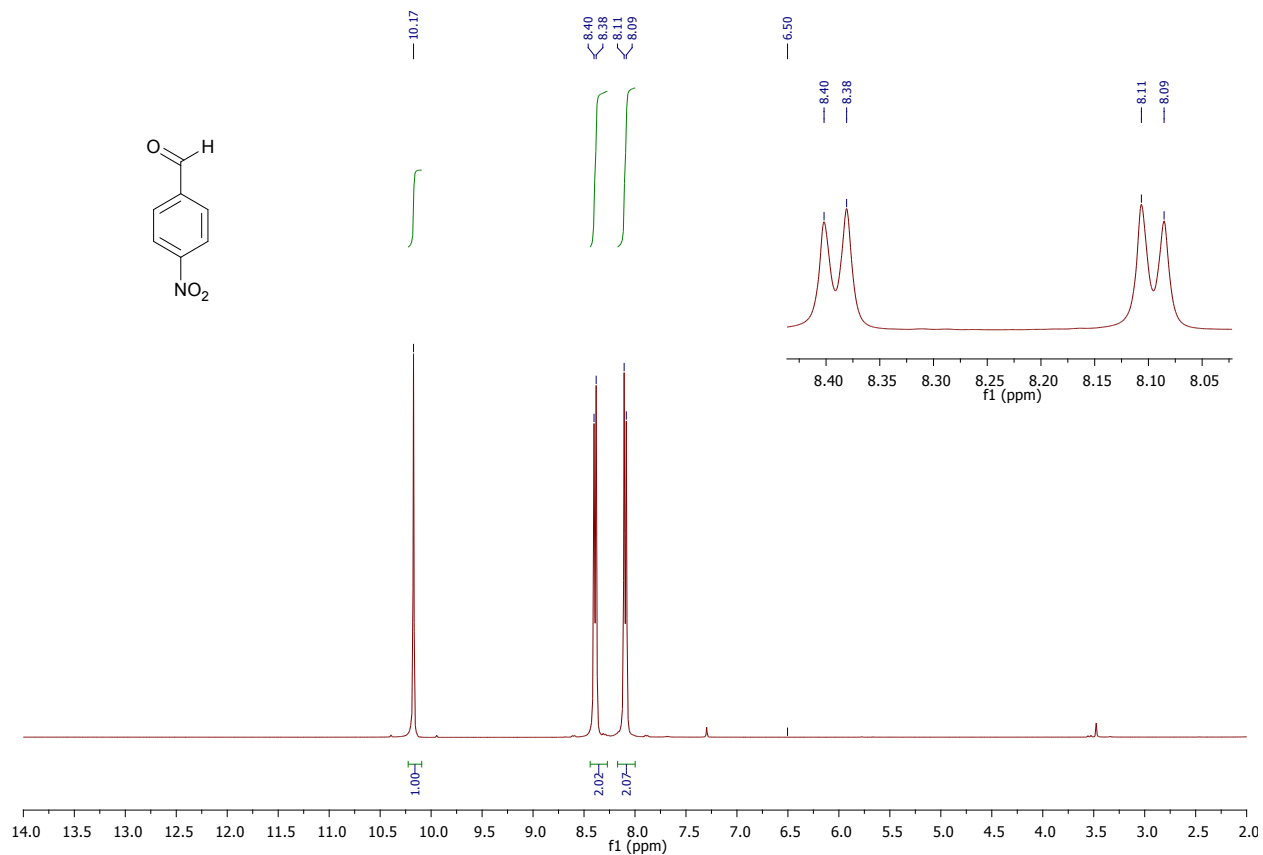

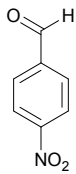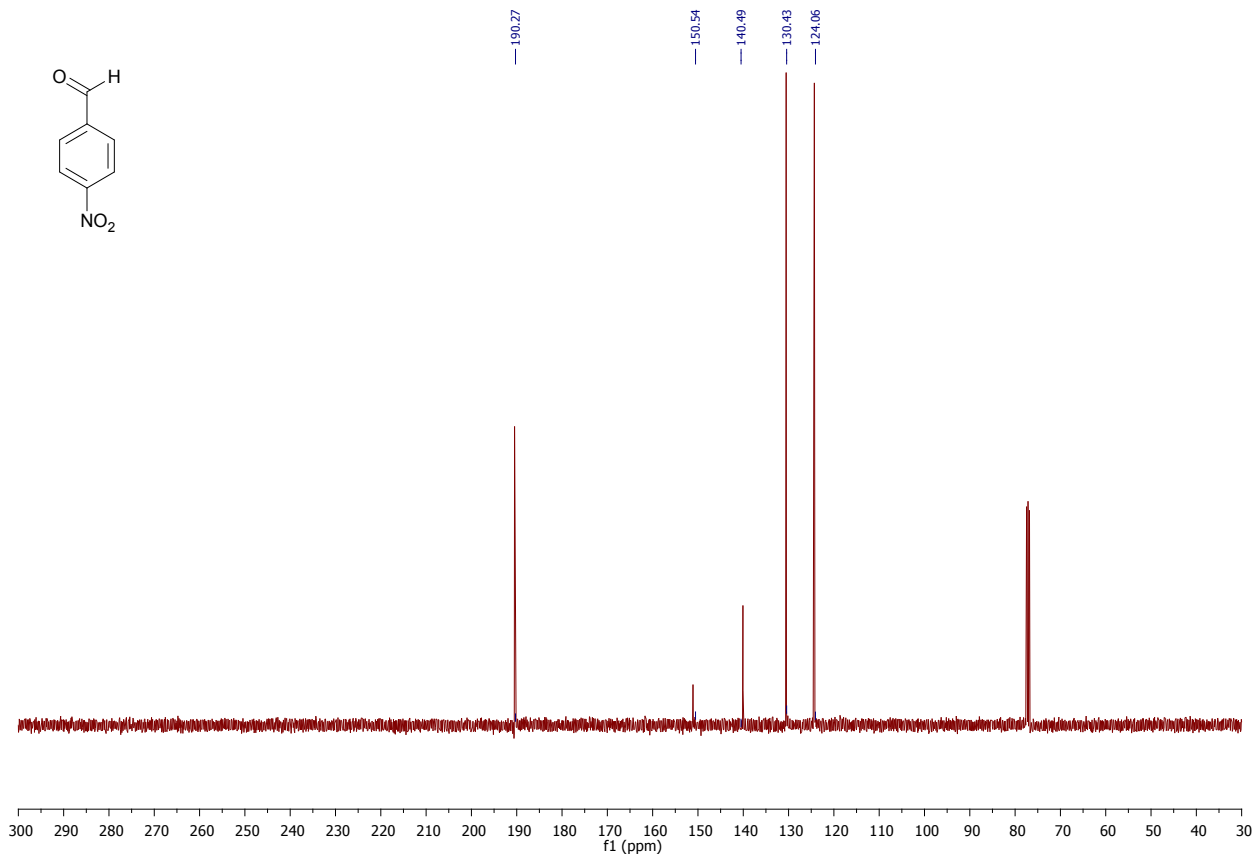

### 3-Nitrobenzaldehyde

$^1\text{H}$  NMR (400 MHz,  $\text{CDCl}_3$ )  $\delta$  10.14 (s, 1H), 8.72 (s, 1H), 8.50 (d,  $J = 8.2$  Hz, 1H), 8.26 (d,  $J = 7.6$  Hz, 1H), 7.80 (t,  $J = 7.9$  Hz, 1H).  $^{13}\text{C}$  NMR (101 MHz,  $\text{CDCl}_3$ ):  $\delta$  189.99, 148.70, 137.39, 130.53, 128.61, 124.32.

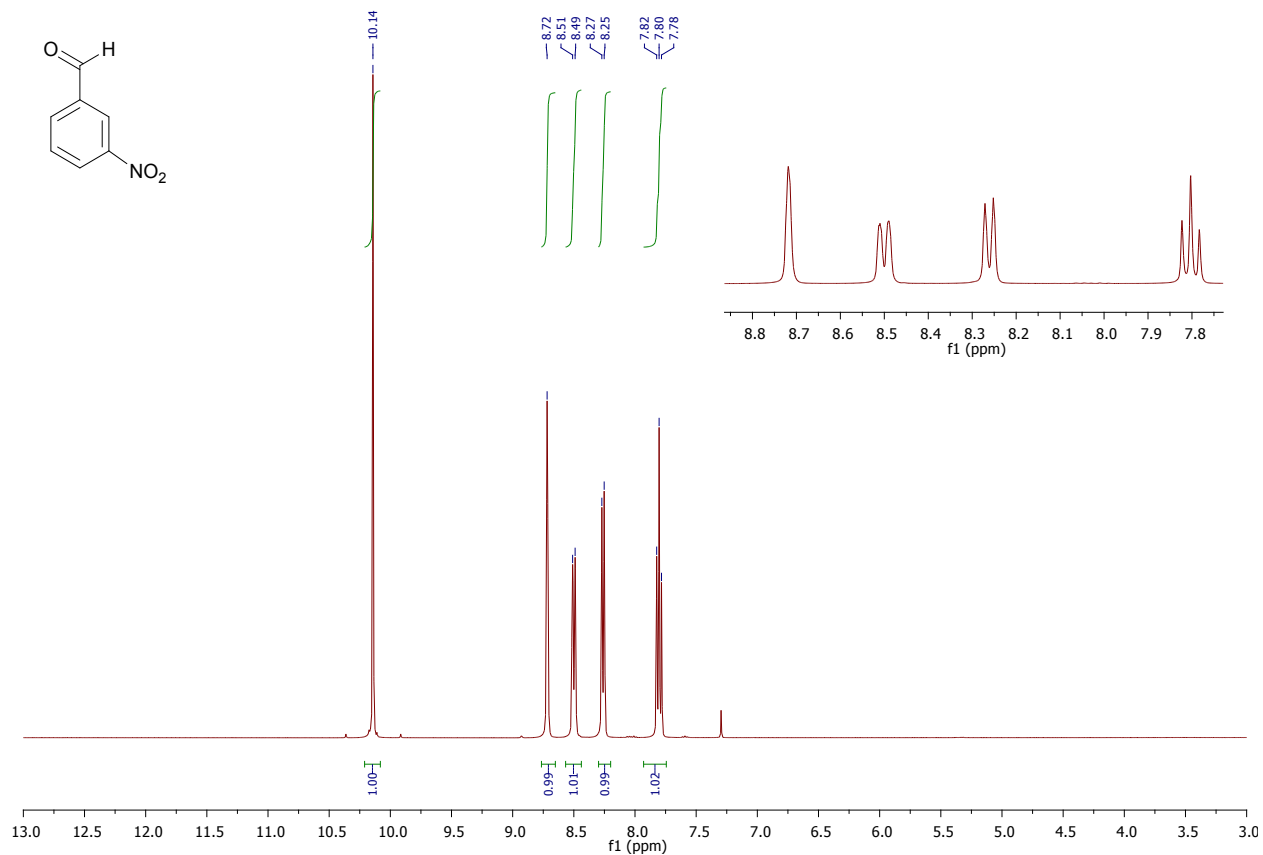

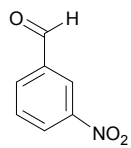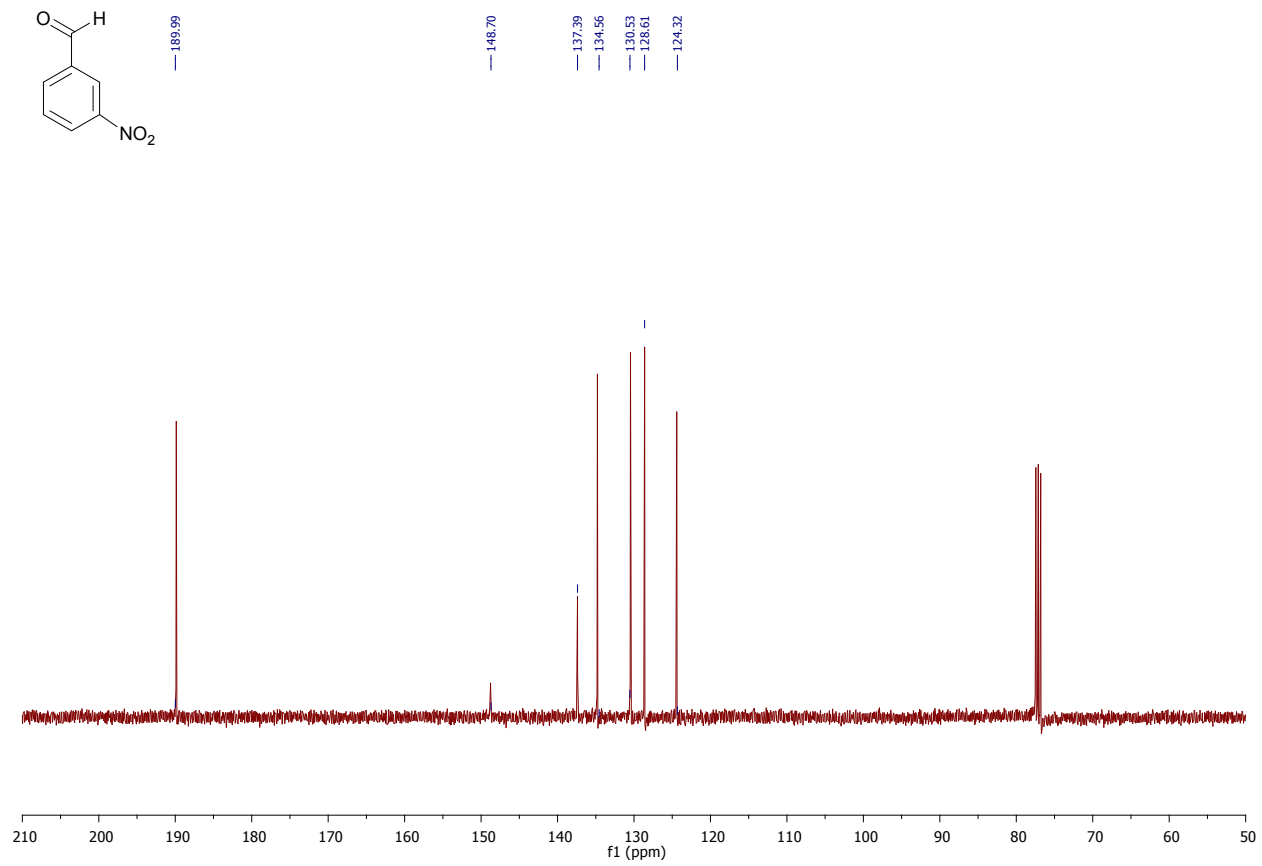

## Benzophenone

$^1\text{H}$  NMR (400 MHz,  $\text{CDCl}_3$ ):  $\delta$  7.84 (d,  $J = 7.1$  Hz, 4H), 7.62 (t,  $J = 7.4$  Hz, 2H), 7.51 (t,  $J = 7.6$  Hz, 4H).  $^{13}\text{C}$  NMR (101 MHz,  $\text{CDCl}_3$ )  $\delta$  196.79, 137.61, 132.48, 129.97, 128.46.

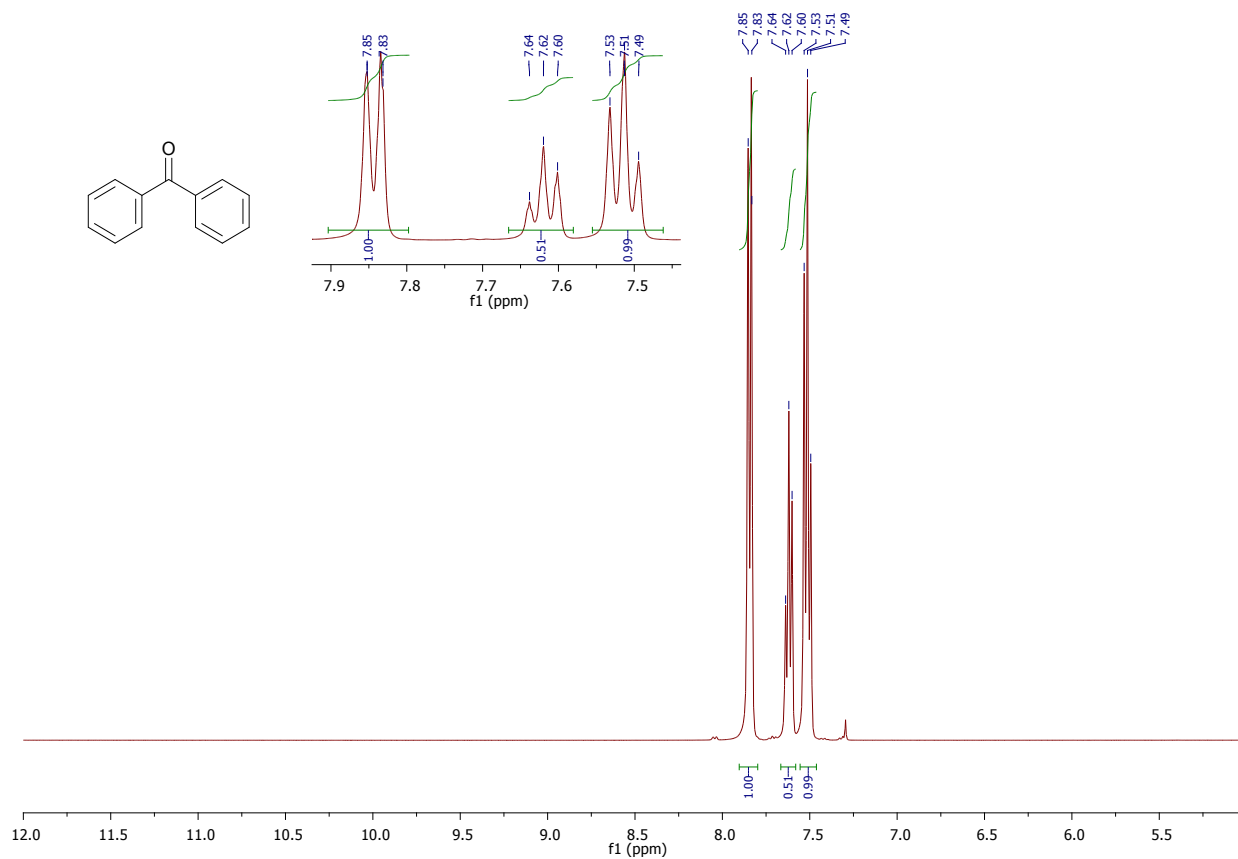

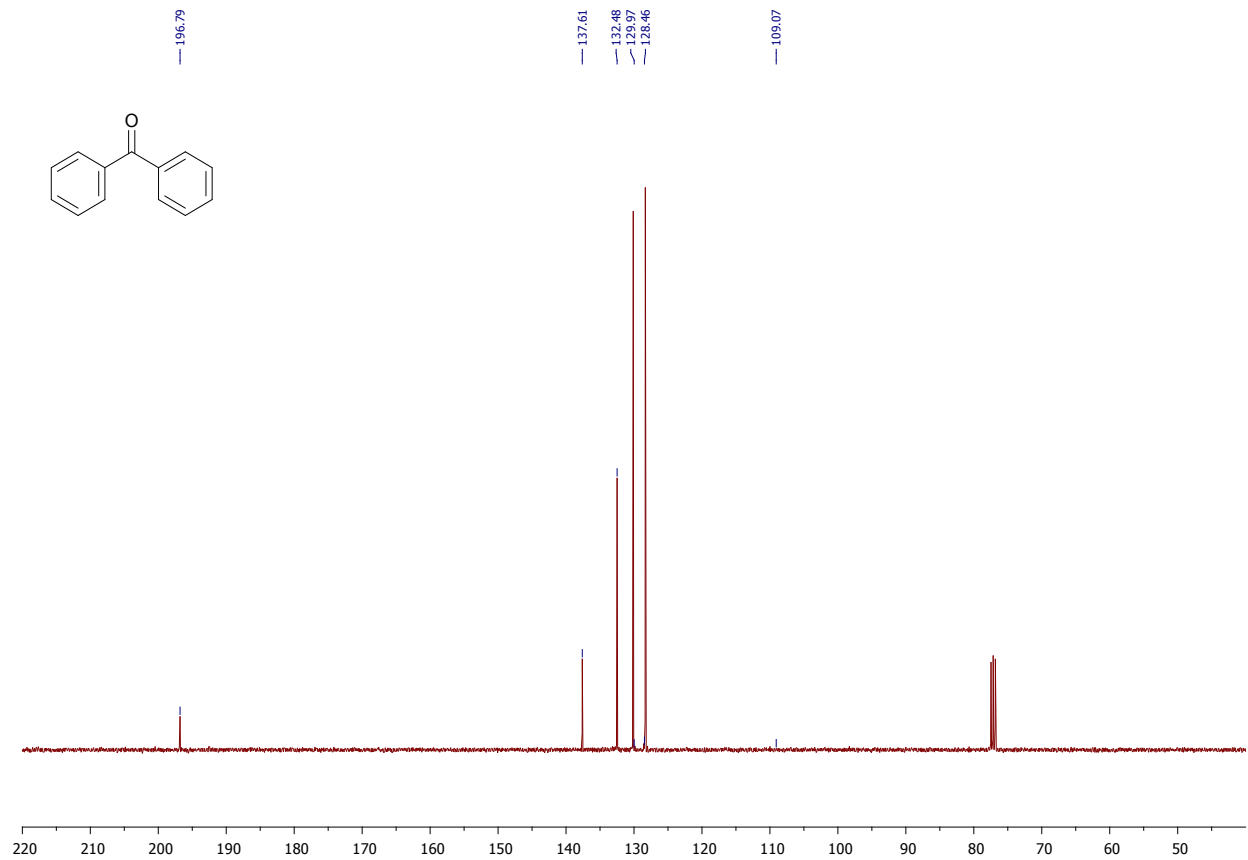



# Acetophenone

$^{13}\text{C}$  NMR (101 MHz,  $\text{CDCl}_3$ )  $\delta$  198.16 (s), 137.09 (s), 133.13 (s), 128.59 (s), 128.31 (s), 26.63 (s).

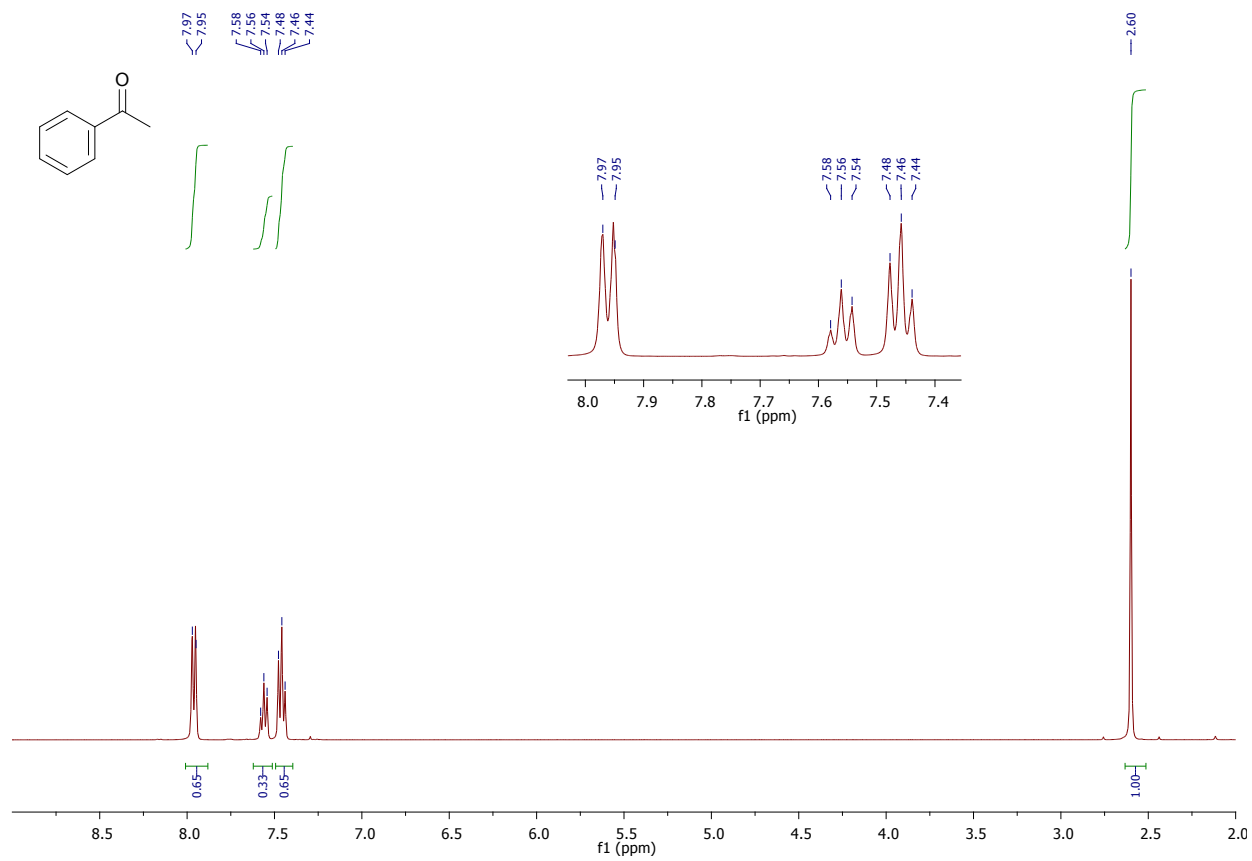

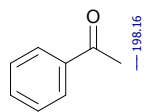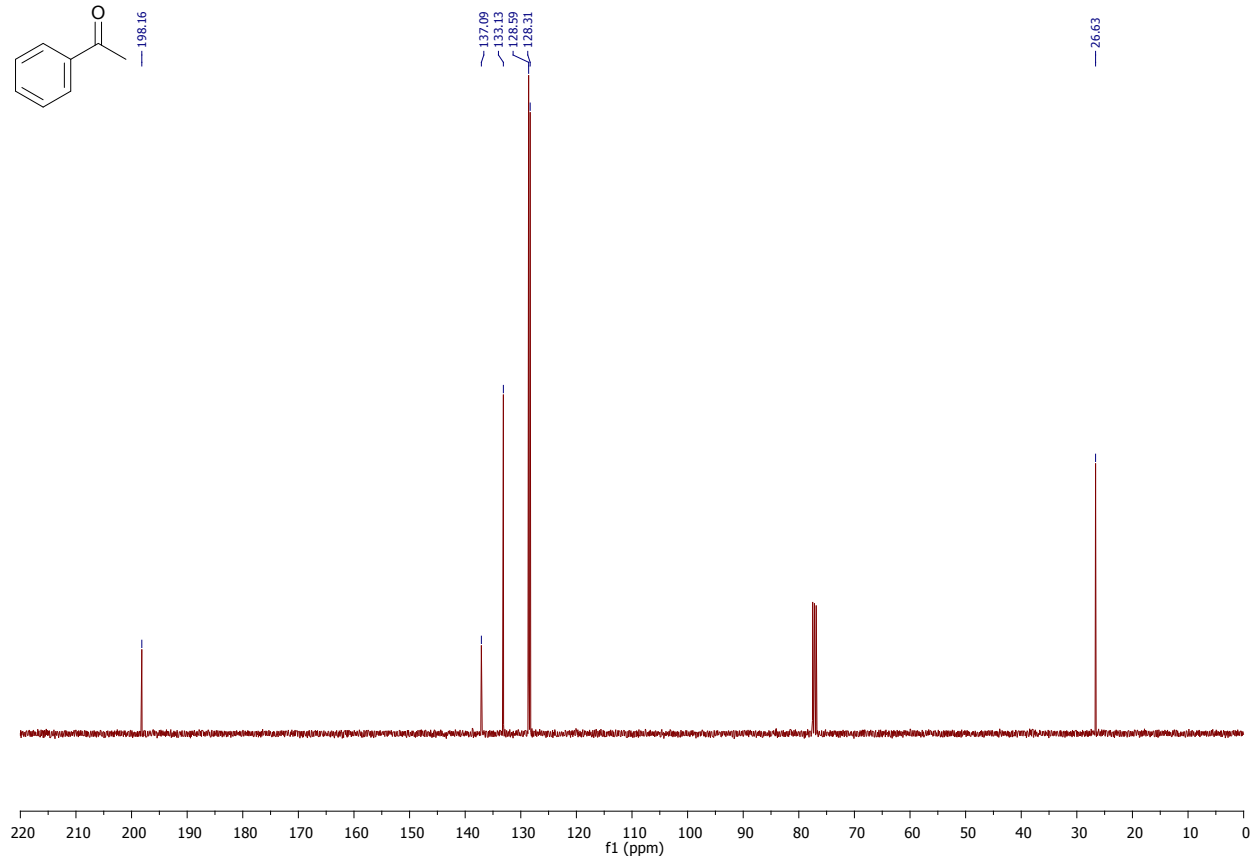

## Cinnamaldehyde

$^1\text{H}$  NMR (400 MHz,  $\text{CDCl}_3$ )  $\delta$  9.68 (d,  $J = 7.7$  Hz, 1H), 7.61 – 7.30 (m, 6H), 6.70 (dd,  $J = 15.9, 7.7$  Hz, 1H).  $^{13}\text{C}$  NMR (101 MHz,  $\text{CDCl}_3$ )  $\delta$  193.76 (s), 152.86 (s), 134.01 (s), 131.32 (s), 128.52 (s).

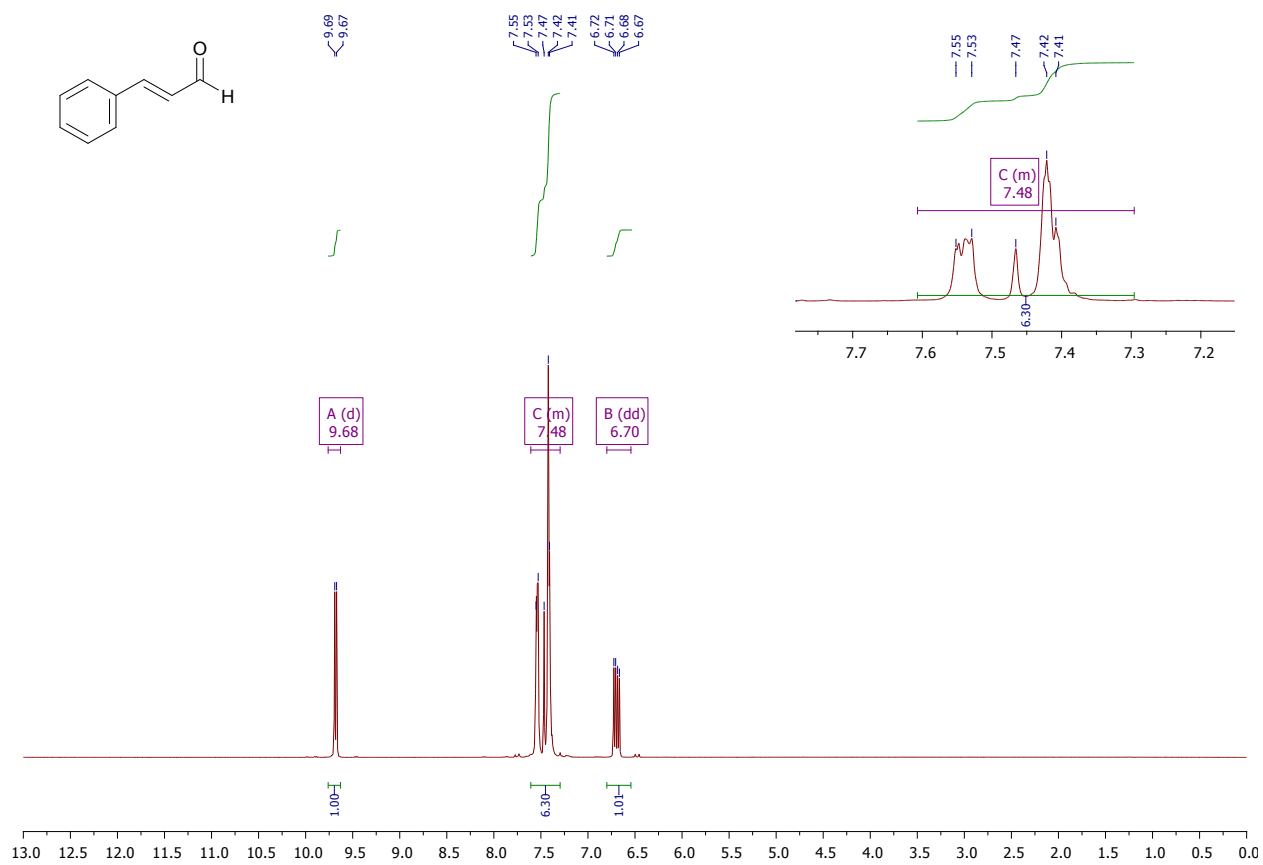

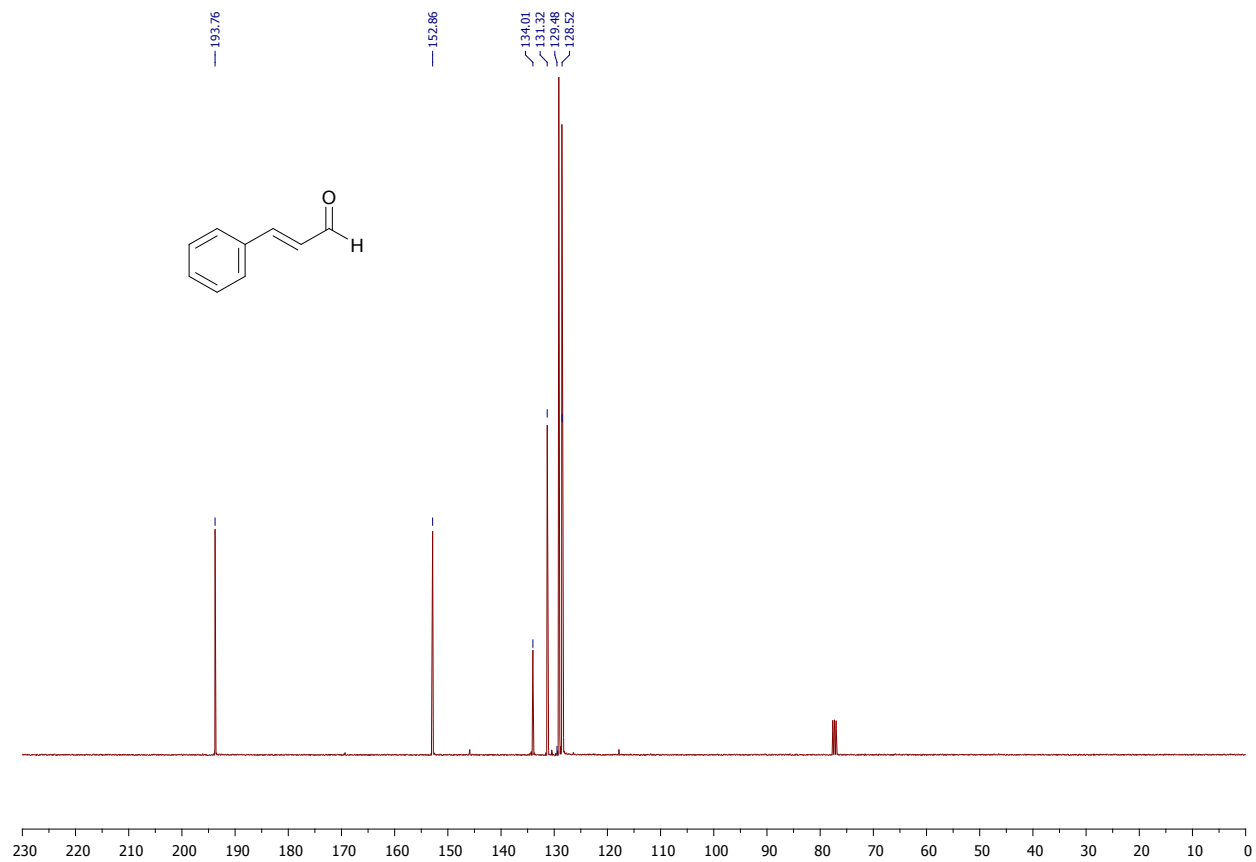

## Furfural

$^1\text{H}$  NMR (400 MHz,  $\text{CDCl}_3$ )  $\delta$  9.43 (s, 1H), 7.53 (s, 1H), 7.10 (d,  $J = 3.6$  Hz, 1H), 6.41 (s, 1H).  $^{13}\text{C}$  NMR (101 MHz,  $\text{CDCl}_3$ ):  $\delta$  177.77, 152.71, 147.87, 121.93, 112.43.

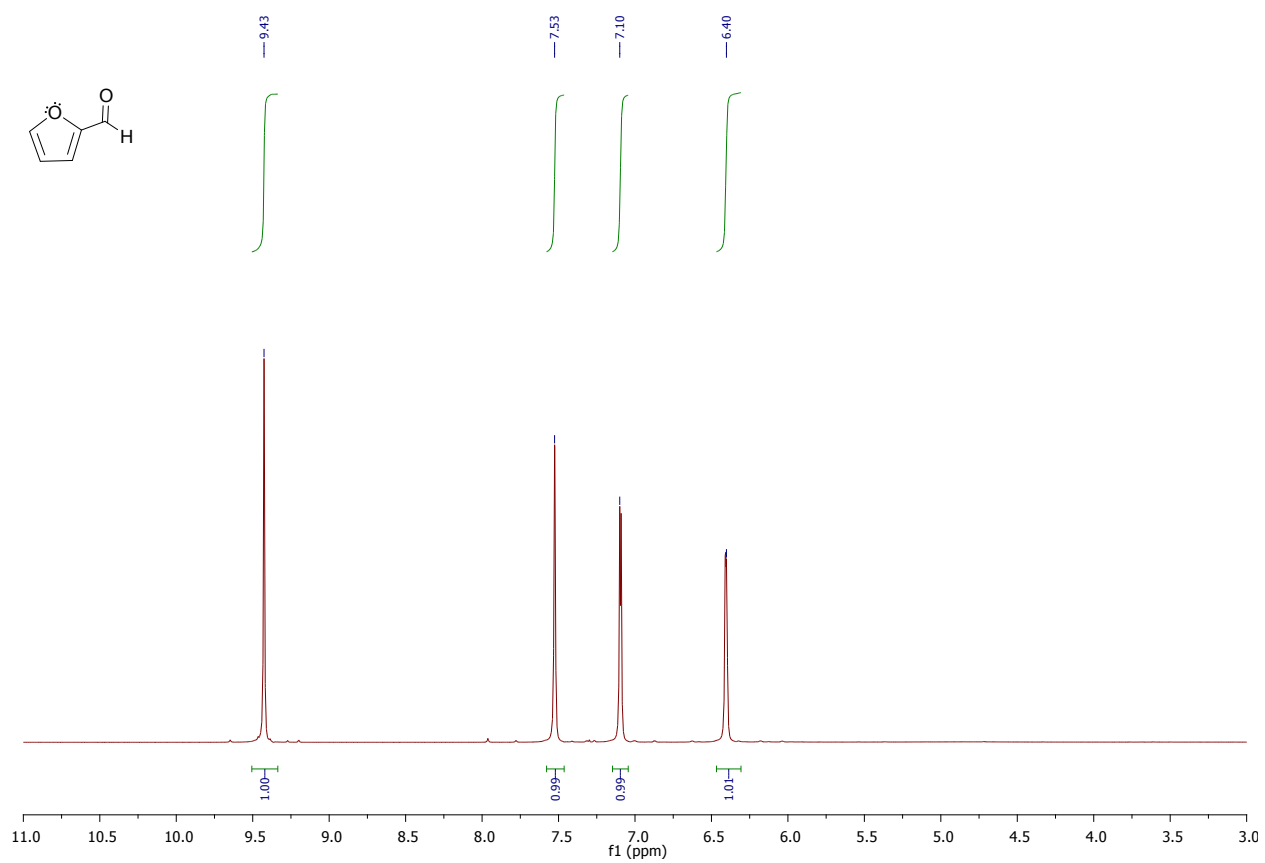

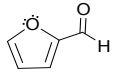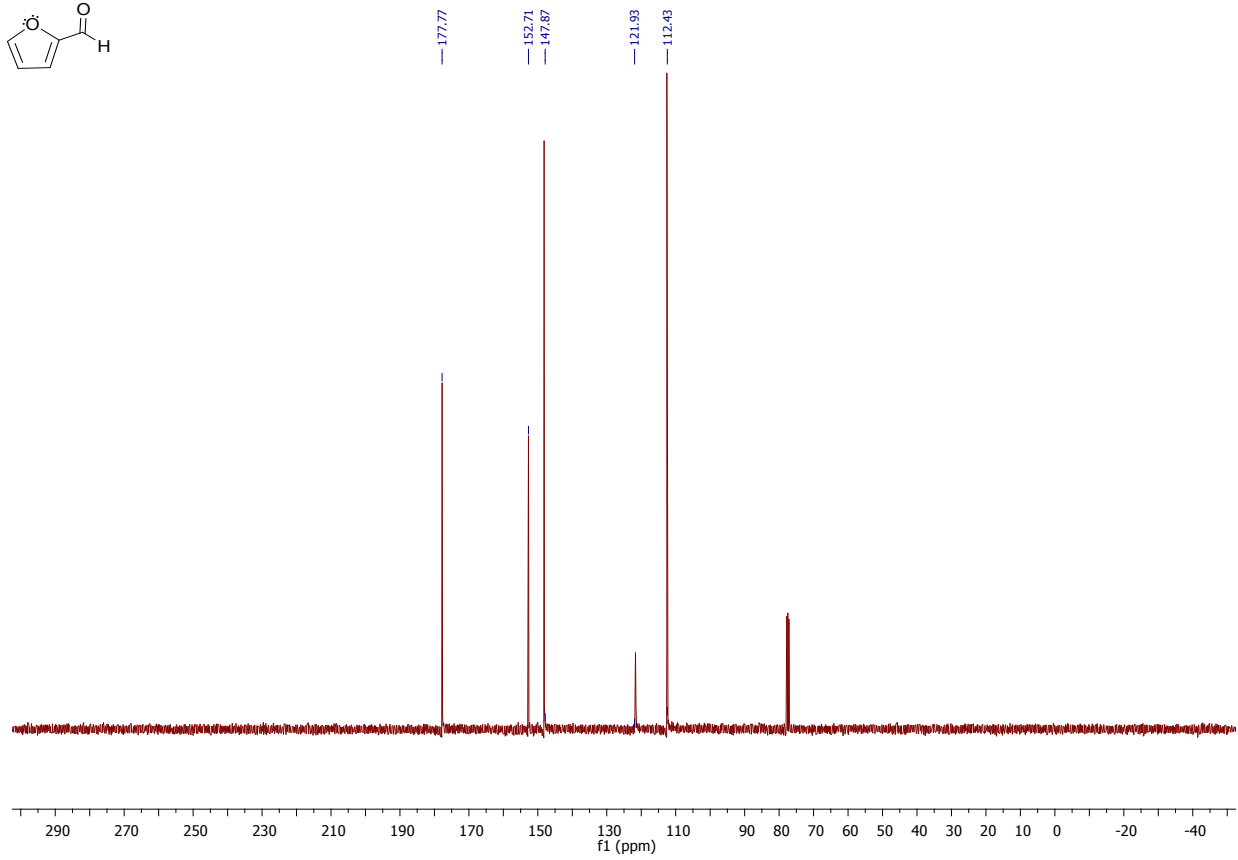

# 1-Octanal

$^1\text{H}$  NMR (250 MHz,  $\text{CDCl}_3$ )  $\delta$  9.723 (s, 1H), 2.387 (t,  $J = 8.1$  Hz, 2H), 1.591 (s, 2H), 1.254 (m, 8H), 0.842 (d,  $J = 6.6$  Hz, 3H).

$^{13}\text{C}$  NMR (63 MHz,  $\text{CDCl}_3$ )  $\delta$  201.87, 43.57, 31.42, 28.83, 22.88, 22.34, 21.81, 13.68.

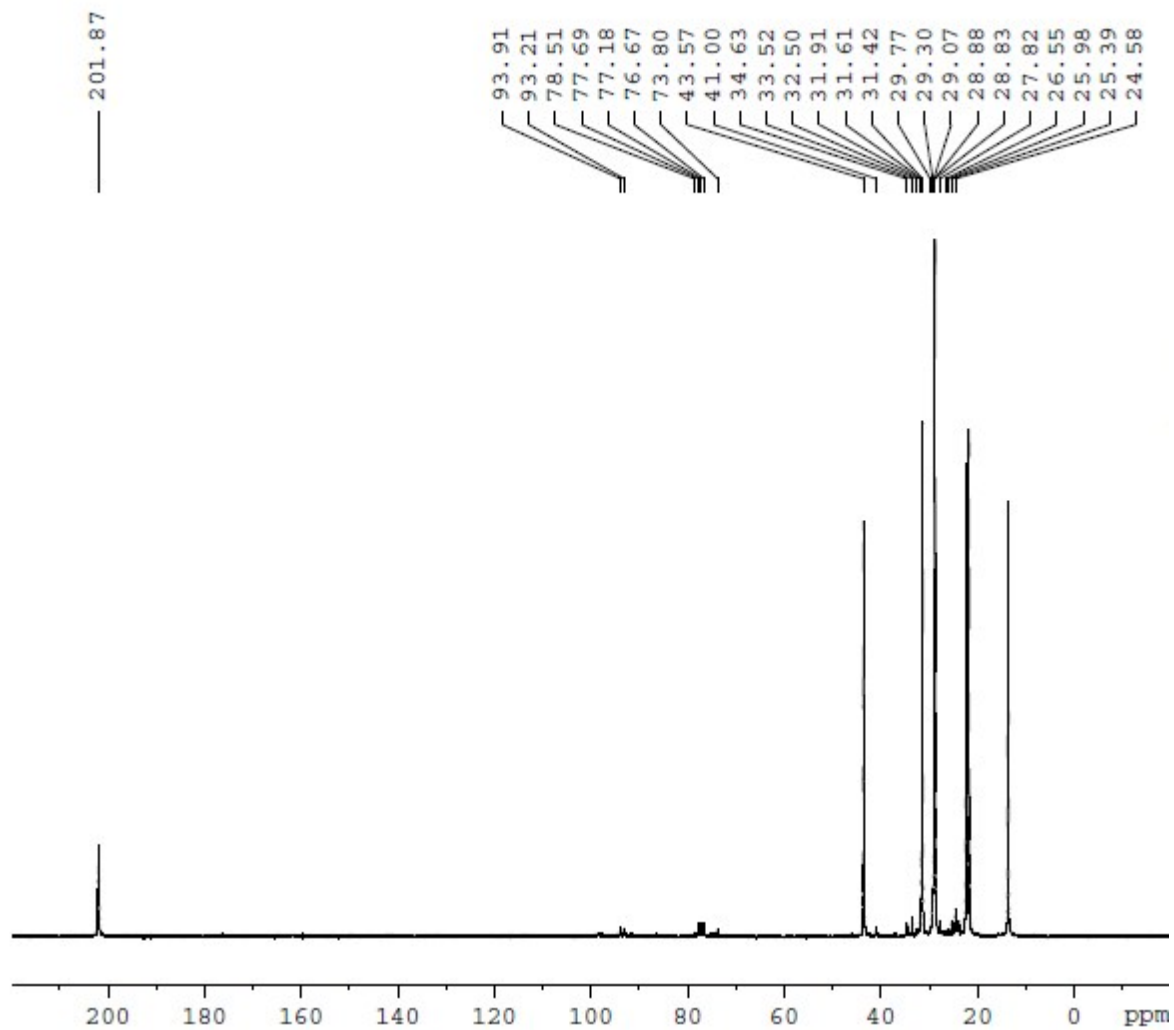

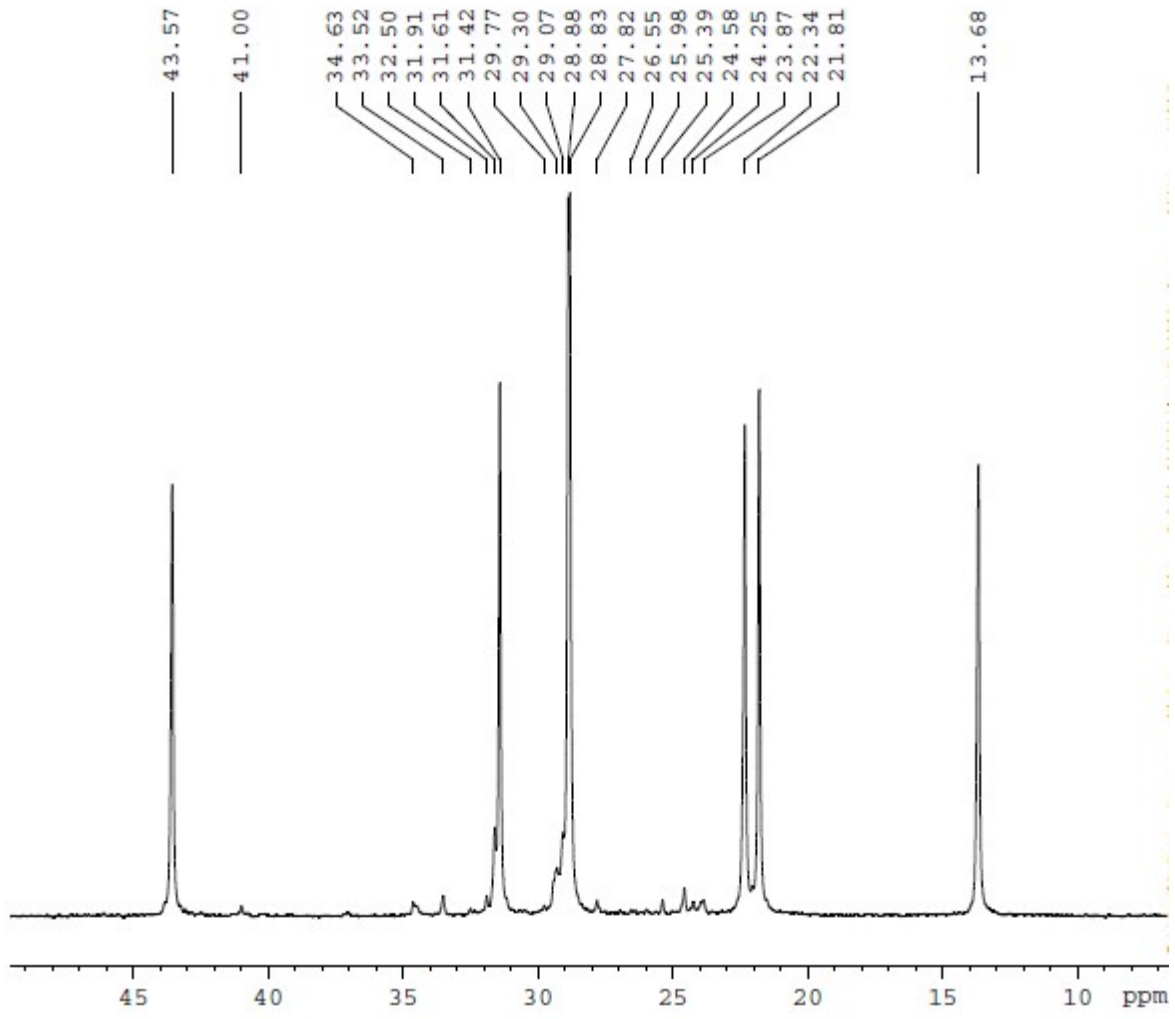



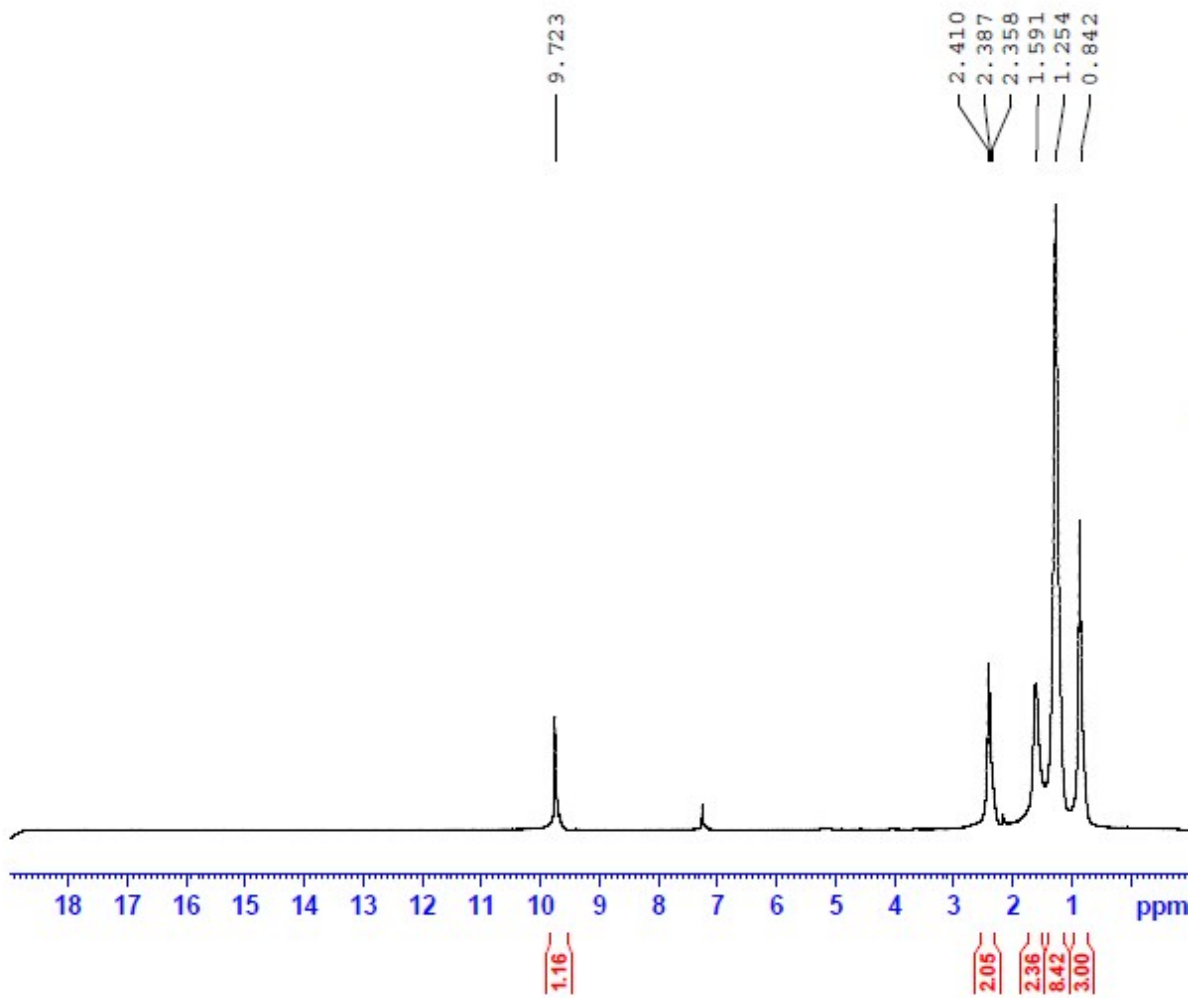

## 2-Octanone

$^1\text{H}$  NMR (400 MHz,  $\text{CDCl}_3$ )  $\delta$  2.35 (s, 2H), 2.06 (s, 3H), 1.49 (s, 2H), 1.21 (s, 6H), 0.82 (s, 3H).  $^{13}\text{C}$  NMR (101 MHz,  $\text{CDCl}_3$ )  $\delta$  209.08, 43.65, 31.52, 29.68, 28.76, 23.71, 22.40, 13.90.

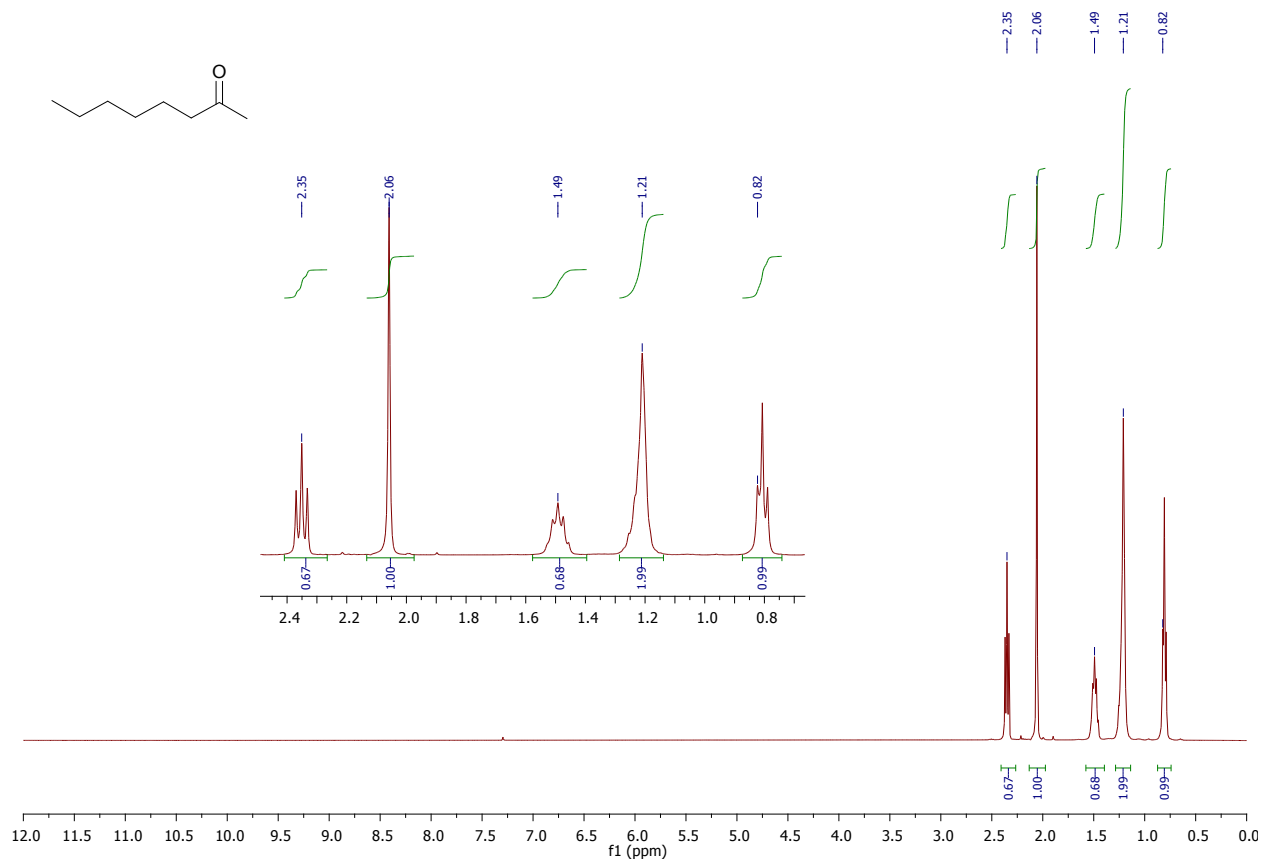

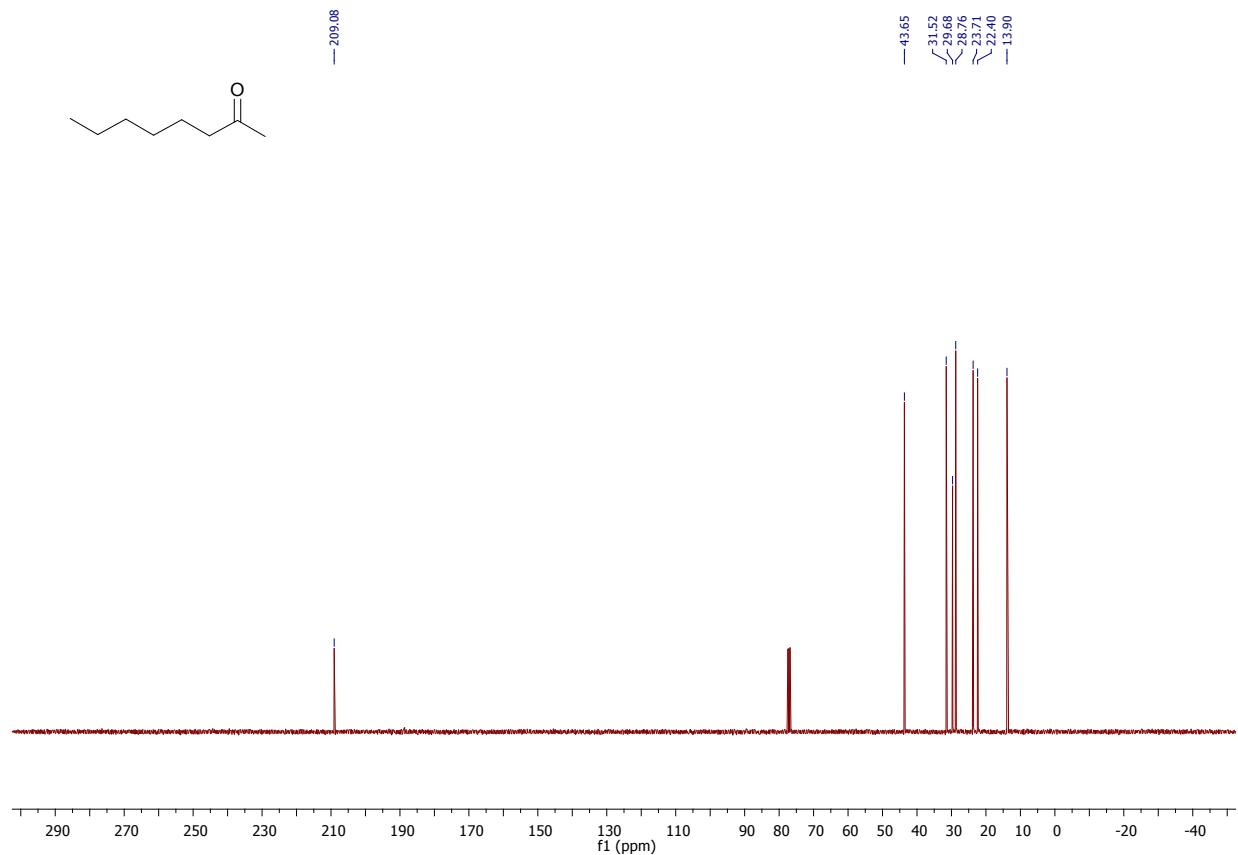

## Reference

1. A. Mardani, M. Heshami, Y. Shariati, F. Kazemi, M. A. Kakroudi and B. Kaboudin, *Journal of Photochemistry and Photobiology A: Chemistry*, 2020, **389**, 112220.
2. X. Wang, R. Liu, Y. Jin and X. Liang, *Chemistry—A European Journal*, 2008, **14**, 2679-2685.
3. L. Rout, P. Nath and T. Punniyamurthy, *Advanced Synthesis & Catalysis*, 2007, **349**, 846-848.
4. T. Dohi, K.-i. Fukushima, T. Kamitanaka, K. Morimoto, N. Takenaga and Y. Kita, *Green Chemistry*, 2012, **14**, 1493-1501.
5. Y. Maeda, N. Kakiuchi, S. Matsumura, T. Nishimura, T. Kawamura and S. Uemura, *The Journal of organic chemistry*, 2002, **67**, 6718-6724.
6. Y. Zhang, X. Jiang, J.-M. Wang, J.-L. Chen and Y.-M. Zhu, *RSC Advances*, 2015, **5**, 17060-17063.
7. V. Polshettiwar and R. S. Varma, *Organic & biomolecular chemistry*, 2009, **7**, 37-40.
8. J. Zheng, S. Lin, X. Zhu, B. Jiang, Z. Yang and Z. Pan, *Chemical Communications*, 2012, **48**, 6235-6237.
